# Supplementary material for: The palladium-catalyzed cyanation of indole C–H bonds with the combination of NH4HCO3 and DMSO as a safe cyanide source
Source: Royal Society of Chemistry journal article supplement (doi:10.1039/c1cc11603g), 2011-01-01

S1

## Supporting Information

The Palladium-Catalyzed Cyanation of Indole C-H Bonds with the  
Combination of  $\text{NH}_4\text{HCO}_3$  and DMSO as a Safe Cyanide Source

Xinyi Ren, Jianbin Chen, Fan Chen\* and Jiang Cheng\*

E-mail: jiangcheng@wzu.edu.cn; fanchen@wzu.edu.cn

|                                                                                                 |              |
|-------------------------------------------------------------------------------------------------|--------------|
| <b>1) General experimental details.....</b>                                                     | <b>S2</b>    |
| <b>2) Spectral data for the products.....</b>                                                   | <b>S3-7</b>  |
| <b>3) The detection of <math>\text{CN}^-</math> by indicator paper.....</b>                     | <b>S8</b>    |
| <b>4) Reference.....</b>                                                                        | <b>S8</b>    |
| <b>5) Copies of <math>^1\text{H}</math> NMR and <math>^{13}\text{C}</math> NMR spectra.....</b> | <b>S9-27</b> |

### 1) General experimental details:

Chemicals were either purchased or purified by standard techniques without special instructions.  $^1\text{H}$  NMR and  $^{13}\text{C}$  NMR spectra were measured on a 500 MHz spectrometer ( $^1\text{H}$  500 MHz,  $^{13}\text{C}$  125 MHz), using  $\text{CDCl}_3$  as the solvent with tetramethylsilane (TMS) as the internal standard at room temperature. Chemical shifts ( $\delta$ ) are given in ppm relative to TMS, the coupling constants  $J$  are given in Hz.

#### General procedure:

Under  $\text{O}_2$ , a sealed tube was charged with 1-methyl-1*H*-indole (0.2 mmol),  $\text{NH}_4\text{HCO}_3$  (0.3 mmol, 1.5 equiv.),  $\text{PdCl}_2$  (10 mol %),  $\text{Cu}(\text{OAc})_2$  (1.1 equiv.), and DMSO (1.5 mL). The tube was kept stirring at 140 °C for 6 h. After the completion of the reaction, as monitored by TLC, brine was added (10 mL), and the reaction mixture was extracted with ethyl acetate (3×5 mL). The ethyl acetate extract was purified by flash column chromatography on silica gel to give the product.

## 2) Spectral data for the products

### 1-methyl-1*H*-indole-3-carbonitrile (2a)<sup>1</sup>

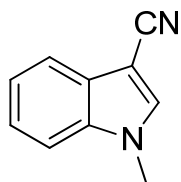

<sup>1</sup>H NMR (CDCl<sub>3</sub>, 500 MHz): δ 7.76 (d, *J* = 7.5 Hz, 1H), 7.56 (s, 1H), 7.41-7.29 (m, 3H), 3.85 (s, 3H).

<sup>13</sup>C NMR (CDCl<sub>3</sub>, 125 MHz): δ 136.0, 135.5, 127.8, 123.8, 122.1, 119.8, 115.9, 110.3, 85.5, 33.6.

### 1,5-dimethyl-1*H*-indole-3-carbonitrile (2b)<sup>1</sup>

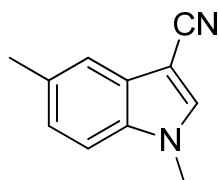

<sup>1</sup>H NMR (CDCl<sub>3</sub>, 500 MHz): δ 7.47 (s, 1H), 7.43 (s, 1H), 7.21-7.19 (m, 1H), 7.10 (d, *J* = 8.5 Hz, 1H), 3.75 (s, 3H), 2.41 (s, 3H).

<sup>13</sup>C NMR (CDCl<sub>3</sub>, 125 MHz): δ 135.3, 134.4, 131.8, 128.1, 125.5, 119.5, 116.1, 109.9, 84.8, 33.6, 21.3.

### 1,6-dimethyl-1*H*-indole-3-carbonitrile (2c)

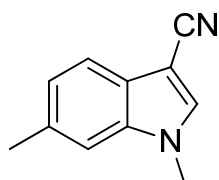

<sup>1</sup>H NMR (CDCl<sub>3</sub>, 500 MHz): δ 7.61 (d, *J* = 8.0 Hz, 1H), 7.46 (s, 1H), 7.17 (s, 1H), 7.12 (d, *J* = 8.5 Hz, 1H), 3.79 (s, 3H), 2.51 (s, 3H);

<sup>13</sup>C NMR (CDCl<sub>3</sub>, 125 MHz): δ 136.4, 135.0, 133.9, 125.5, 123.8, 119.3, 116.1, 110.2, 85.1, 33.4, 21.8.

IR (prism, cm<sup>-1</sup>): 3039, 2208, 1532, 1251, 738.

MS(EI) 170 (M<sup>+</sup>); HRMS Calcd. for C<sub>11</sub>H<sub>10</sub>N<sub>2</sub> (M<sup>+</sup>) 170.0844, found 170.0850.

### 1,7-dimethyl-1*H*-indole-3-carbonitrile (2d)<sup>2</sup>

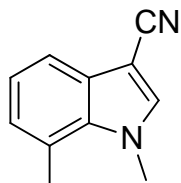

<sup>1</sup>H NMR (CDCl<sub>3</sub>, 500 MHz): δ 7.57 (d, *J* = 8.0 Hz, 1H), 7.43 (s, 1H), 7.14 (t, *J* = 7.5

S4

Hz, 1H), 7.03 (d,  $J = 7.5$  Hz, 1H), 4.09 (s, 3H), 2.76 (s, 3H).

$^{13}\text{C}$  NMR ( $\text{CDCl}_3$ , 125 MHz):  $\delta$  136.7, 134.8, 129.0, 126.4, 122.3, 122.2, 117.9, 115.9, 85.3, 37.6, 19.4.

**5-methoxy-1-methyl-1*H*-indole-3-carbonitrile (2e)<sup>1</sup>**

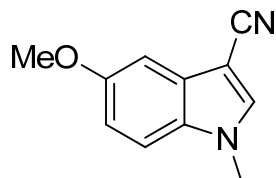

$^1\text{H}$  NMR ( $\text{CDCl}_3$ , 500 MHz):  $\delta$  7.43 (s, 1H), 7.19 (d,  $J = 9.0$  Hz, 1H), 7.09 (s, 1H), 6.90 (d,  $J = 9.0$  Hz, 1H), 3.80 (s, 3H), 3.75 (s, 3H).

$^{13}\text{C}$  NMR ( $\text{CDCl}_3$ , 125 MHz):  $\delta$  156.0, 135.3, 131.0, 128.7, 116.1, 114.6, 111.2, 100.8, 85.0, 55.8, 33.8.

**4-methoxy-1-methyl-1*H*-indole-3-carbonitrile (2f)**

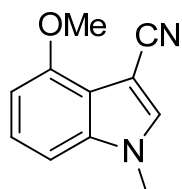

$^1\text{H}$  NMR ( $\text{CDCl}_3$ , 500 MHz):  $\delta$  7.40 (s, 1H), 7.20-7.17 (m, 1H), 6.90 (d,  $J = 8.5$  Hz, 1H), 6.58 (d,  $J = 8.0$  Hz, 1H), 3.91 (s, 3H), 3.74 (s, 3H).

$^{13}\text{C}$  NMR ( $\text{CDCl}_3$ , 125 MHz):  $\delta$  153.7, 137.5, 135.0, 124.9, 117.5, 116.7, 103.1, 101.8, 84.0, 55.6, 33.8.

IR (prism,  $\text{cm}^{-1}$ ): 3122, 2215, 1527, 1264, 733.

MS(EI) 186 ( $\text{M}^+$ ); HRMS Calcd. for  $\text{C}_{11}\text{H}_{10}\text{N}_2\text{O}$  ( $\text{M}^+$ ) 186.0793, found 186.0797.

**5-fluoro-1-methyl-1*H*-indole-3-carbonitrile (2g)**

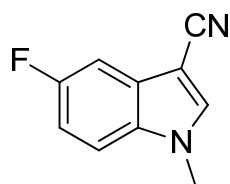

$^1\text{H}$  NMR ( $\text{CDCl}_3$ , 500 MHz):  $\delta$  7.58 (s, 1H), 7.39 (d,  $J = 8.5$  Hz, 1H), 7.32 (d,  $J = 9.0$  Hz, 1H), 7.09 (t,  $J = 9.0$  Hz, 1H), 3.85 (s, 3H).

$^{13}\text{C}$  NMR ( $\text{CDCl}_3$ , 125 MHz):  $\delta$  159.2 (d,  $J_{\text{C-F}} = 238.4$  Hz), 136.7, 132.6, 128.4, (d,  $J_{\text{C-F}} = 10.8$  Hz), 115.4, 112.6 (d,  $J_{\text{C-F}} = 26.4$  Hz), 111.4 (d,  $J_{\text{C-F}} = 9.6$  Hz), 105.1 (d,  $J_{\text{C-F}} = 24.8$  Hz), 85.6 (d,  $J_{\text{C-F}} = 4.6$  Hz), 33.9.

IR (prism,  $\text{cm}^{-1}$ ): 3051, 2220, 1534, 1191, 740.

MS(EI) 174 ( $\text{M}^+$ ); HRMS Calcd. for  $\text{C}_{10}\text{H}_7\text{N}_2\text{F}$  ( $\text{M}^+$ ) 174.0593, found 174.0585.

**5-bromo-1-methyl-1*H*-indole-3-carbonitrile (2h)**

S5

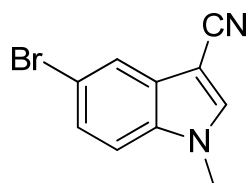

$^1\text{H}$  NMR ( $\text{CDCl}_3$ , 500 MHz):  $\delta$  7.89 (s, 1H), 7.55 (s, 1H), 7.44 (d,  $J = 9.0$  Hz, 1H), 7.26 (d,  $J = 9.0$  Hz, 1H), 3.85 (s, 3H).

$^{13}\text{C}$  NMR ( $\text{CDCl}_3$ , 125 MHz):  $\delta$  136.3, 134.7, 129.2, 127.0, 122.5, 115.8, 115.1, 111.8, 85.3, 33.8.

IR (prism,  $\text{cm}^{-1}$ ): 3053, 2219, 1540, 1266, 740.

MS(EI) 233 ( $\text{M}^+$ ); HRMS Calcd. for  $\text{C}_{10}\text{H}_7\text{N}_2\text{Br}$  ( $\text{M}^+$ ) 233.9793, found 233.9798.

**1,2-dimethyl-1H-indole-3-carbonitrile (2i)<sup>1</sup>**

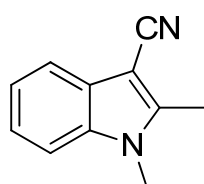

$^1\text{H}$  NMR ( $\text{CDCl}_3$ , 500 MHz):  $\delta$  7.65 (d,  $J = 7.5$  Hz, 1H), 7.32-7.23 (m, 3H), 3.70 (s, 3H), 2.58 (s, 3H).

$^{13}\text{C}$  NMR ( $\text{CDCl}_3$ , 125 MHz):  $\delta$  145.6, 136.3, 127.0, 123.0, 121.9, 119.0, 116.6, 109.7, 84.9, 30.1, 12.0.

**1-methyl-2-phenyl-1H-indole-3-carbonitrile (2j)<sup>1</sup>**

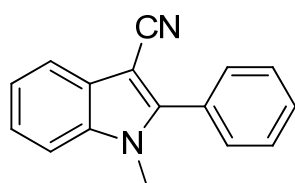

$^1\text{H}$  NMR ( $\text{CDCl}_3$ , 500 MHz):  $\delta$  7.79 (d,  $J = 7.5$  Hz, 1H), 7.59-7.53 (m, 5H), 7.45-7.32 (m, 3H).

$^{13}\text{C}$  NMR ( $\text{CDCl}_3$ , 125 MHz):  $\delta$  148.1, 136.8, 129.9, 129.8, 129.0, 128.7, 127.6, 123.9, 122.4, 119.6, 116.6, 110.5, 85.6, 31.7.

**1-phenyl-1H-indole-3-carbonitrile (2k)<sup>1</sup>**

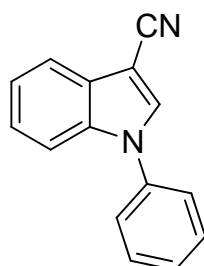

$^1\text{H}$  NMR ( $\text{CDCl}_3$ , 500 MHz):  $\delta$  7.85-7.83 (m, 1H), 7.81 (s, 1H), 7.60-7.57 (m, 2H), 7.53-7.48 (m, 4H), 7.36-7.34 (m, 2H).

S6

$^{13}\text{C}$  NMR ( $\text{CDCl}_3$ , 125 MHz):  $\delta$  137.8, 135.6, 134.6, 130.0, 128.4, 128.0, 124.9, 124.5, 122.8, 120.0, 115.5, 111.5, 88.1.

**1-benzyl-1*H*-indole-3-carbonitrile (2l)<sup>1</sup>**

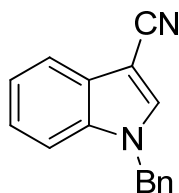

$^1\text{H}$  NMR ( $\text{CDCl}_3$ , 500 MHz):  $\delta$  7.80-7.78 (m, 1H), 7.61 (s, 1H), 7.38-7.29 (m, 6H), 7.16-7.14 (m, 2H), 5.35 (s, 2H).

$^{13}\text{C}$  NMR ( $\text{CDCl}_3$ , 125 MHz):  $\delta$  135.6, 135.2, 134.9, 129.1, 128.4, 128.0, 127.1, 124.0, 122.3, 120.0, 115.8, 110.8, 86.3, 50.9.

**1-methyl-1*H*-pyrrolo[2,3-*b*]pyridine-3-carbonitrile (2m)**

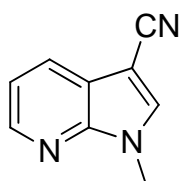

$^1\text{H}$  NMR ( $\text{CDCl}_3$ , 500 MHz):  $\delta$  8.41 (s, 1H), 8.01 (d,  $J$  = 8.0 Hz, 1H), 7.67 (s, 1H), 7.21-7.19 (m, 1H); 3.90 (s, 3H).

$^{13}\text{C}$  NMR ( $\text{CDCl}_3$ , 125 MHz):  $\delta$  146.8, 145.1, 135.9, 128.3, 120.1, 118.1, 115.1, 84.3, 32.1.

IR (prism,  $\text{cm}^{-1}$ ): 3051, 2219, 1533, 1266, 740.

MS(EI) 157 ( $\text{M}^+$ ); HRMS Calcd. for  $\text{C}_9\text{H}_7\text{N}_3$  ( $\text{M}^+$ ) 157.0640, found 157.0639.

**1-methyl-1*H*-indole-3,5-dicarbonitrile (2n and 2o)**

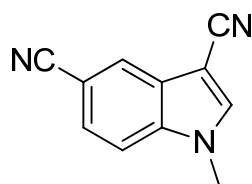

$^1\text{H}$  NMR ( $\text{CDCl}_3$ , 500 MHz):  $\delta$  8.10 (s, 1H), 7.72 (s, 1H), 7.59 (d,  $J$  = 8.5 Hz, 1H), 7.50 (d,  $J$  = 9.0 Hz, 1H), 3.92 (s, 3H).

$^{13}\text{C}$  NMR ( $\text{CDCl}_3$ , 125 MHz):  $\delta$  137.7, 137.5, 127.4, 126.8, 125.2, 119.3, 114.2, 111.5, 105.9, 87.1, 34.0.

IR (prism,  $\text{cm}^{-1}$ ): 3051, 2219, 1533, 1267, 737.

MS(EI) 181 ( $\text{M}^+$ ); HRMS Calcd. for  $\text{C}_{11}\text{H}_7\text{N}_3$  ( $\text{M}^+$ ) 181.0640, found 181.0637.

**1-methyl-5-nitro-1*H*-indole-3-carbonitrile (2p)**

S7

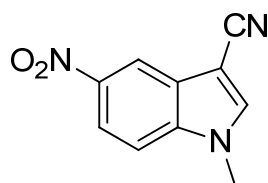

$^1\text{H}$  NMR ( $\text{CDCl}_3$ , 500 MHz):  $\delta$  8.72 (s, 1H), 8.27 (d,  $J = 9.0$  Hz, 1H), 7.75 (s, 1H), 7.49 (d,  $J = 9.0$  Hz, 1H), 3.95 (s, 3H).

$^{13}\text{C}$  NMR ( $\text{CDCl}_3$ , 125 MHz):  $\delta$  143.6, 138.6, 138.5, 127.1, 119.4, 116.9, 114.0, 110.8, 88.6, 34.2.

IR (prism,  $\text{cm}^{-1}$ ): 3051, 2220, 1533, 1266, 738.

MS(EI) 201 ( $\text{M}^+$ ); HRMS Calcd. for  $\text{C}_{10}\text{H}_7\text{N}_3\text{O}_2$  ( $\text{M}^+$ ) 201.0538, found 201.0537.

**methyl 3-cyano-1-methyl-1H-indole-5-carboxylate (2q)**

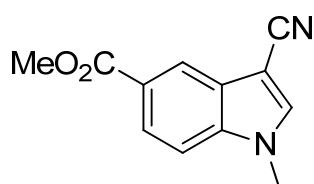

$^1\text{H}$  NMR ( $\text{CDCl}_3$ , 500 MHz):  $\delta$  8.48 (s, 1H), 8.04 (d,  $J = 8.5$  Hz, 1H), 7.63 (s, 1H), 7.41 (d,  $J = 8.5$  Hz, 1H), 3.95 (s, 3H), 3.89 (s, 3H).

$^{13}\text{C}$  NMR ( $\text{CDCl}_3$ , 125 MHz):  $\delta$  167.2, 138.3, 136.9, 127.2, 125.1, 124.3, 122.4, 115.0, 110.2, 87.2, 52.2, 33.8.

IR (prism,  $\text{cm}^{-1}$ ): 3109, 2209, 1700, 1530, 1239, 742.

MS(EI) 214 ( $\text{M}^+$ ); HRMS Calcd. for  $\text{C}_{12}\text{H}_{10}\text{N}_2\text{O}_2$  ( $\text{M}^+$ ) 214.0742, found 214.0749.

**5-(methoxymethyl)-1-methyl-1H-indole-3-carbonitrile (2r)**

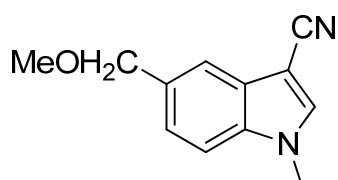

$^1\text{H}$  NMR ( $\text{CDCl}_3$ , 500 MHz):  $\delta$  7.72 (s, 1H), 7.56 (s, 1H), 7.37 (d,  $J = 8.5$  Hz, 2H), 4.58 (s, 2H), 3.85 (s, 3H), 3.40 (s, 3H).

$^{13}\text{C}$  NMR ( $\text{CDCl}_3$ , 125 MHz):  $\delta$  135.8, 135.6, 132.3, 127.8, 124.1, 119.3, 115.8, 110.4, 85.6, 74.8, 58.0, 33.7, 29.7.

IR (prism,  $\text{cm}^{-1}$ ): 3115, 2217, 1529, 1248, 741.

MS(EI) 200 ( $\text{M}^+$ ); HRMS Calcd. for  $\text{C}_{12}\text{H}_{12}\text{N}_2\text{O}$  ( $\text{M}^+$ ) 200.0950, found 200.0951.

### 3) The $\text{CN}^-$ was detected by indicator paper

#### (1) Principle:

The combination of  $\text{CN}^-$  with acids produces hydrocyanic acid, which reacts with picric acid showed rose-red colour.

**(2) Detection of  $\text{CN}^-$ :** A picric acid test strip was inserted into a glass tube, and drops of saturated sodium carbonate solution was dropped on it to make it wet. Then, the glass tube was inserted into the rubber stopper with a suitable hole. 0.2 g of tartrate solid and 1.5 mL of the reaction solution were added to flask, which was stuffed by rubber stopper fitted with glass tube, immediately. The flask was heated in the water bath under 80 °C for 20 minutes. The test paper appeared rose-red, which proved the existence of  $\text{CN}^-$ .

Table S1 Detection of  $\text{CN}^-$  by indicator paper<sup>a</sup>

|      |                           |              |                 |                           |   |
|------|---------------------------|--------------|-----------------|---------------------------|---|
| DMSO | $\text{NH}_4\text{HCO}_3$ | $\text{O}_2$ |                 |                           | - |
| DMSO | $\text{NH}_4\text{HCO}_3$ | $\text{O}_2$ | $\text{PdCl}_2$ |                           | - |
| DMSO | $\text{NH}_4\text{HCO}_3$ | $\text{O}_2$ |                 | $\text{Cu}(\text{OAc})_2$ | + |
| DMSO | $\text{NH}_4\text{HCO}_3$ | $\text{O}_2$ | $\text{PdCl}_2$ | $\text{Cu}(\text{OAc})_2$ | + |

<sup>a</sup> Reaction conditions: the mixture was heated under 140 °C for 3 h. “-” means negative; “+” means positive.

### 4) References

- (1) G. Yan, C. Kuang, Y. Zhang and J. Wang, *Org. Lett.*, 2010, **12**, 1052..
- (2) C. J. Swain, R. Baker, C. Kneen, J. Moseley, J. Saunders, E. M. Seward, G. Stevenson, M. Beer and J. Stanton, *J. Med. Chem.*, 1991, **34**, 140.



S9

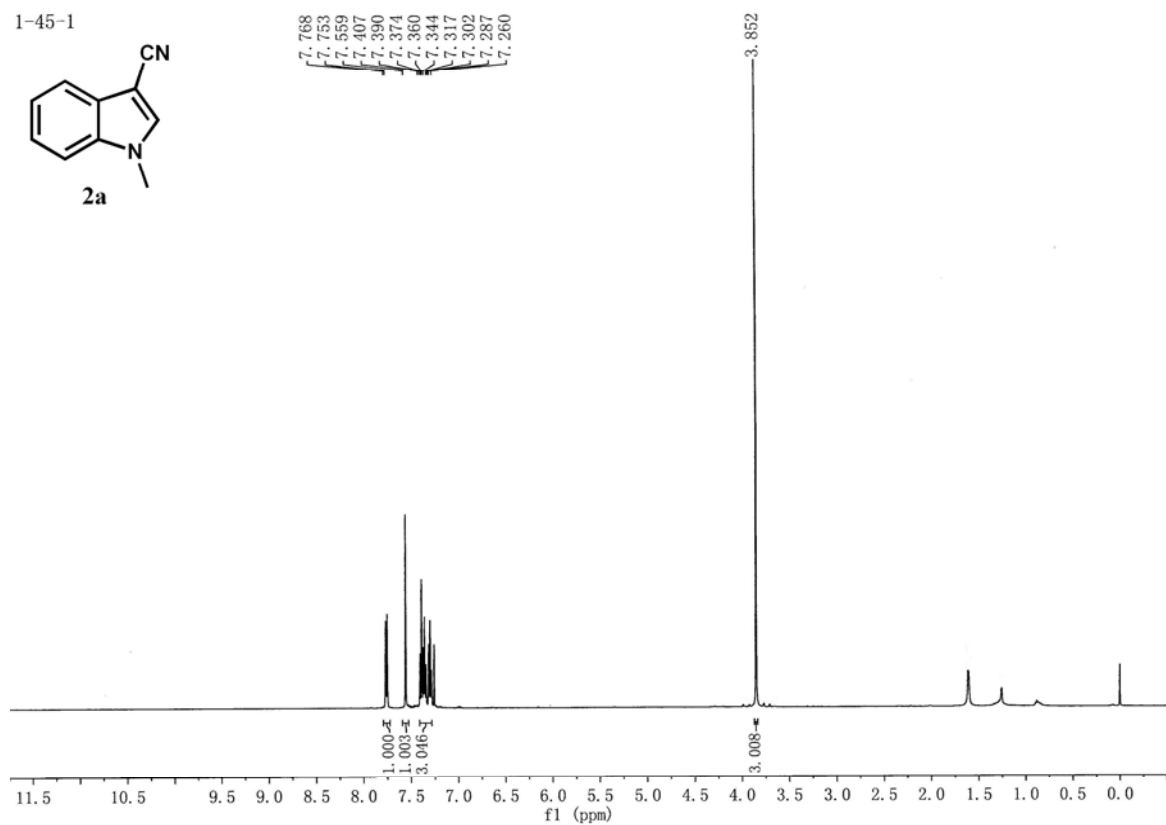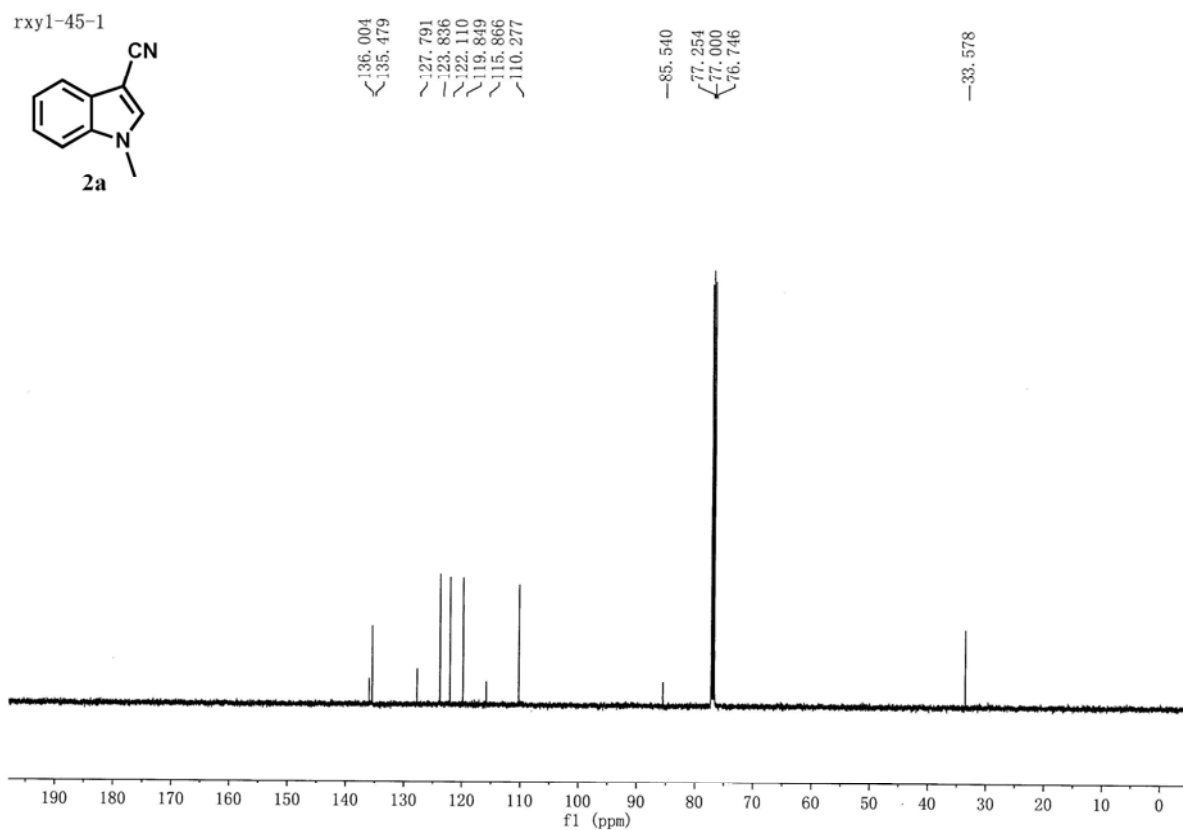

S10

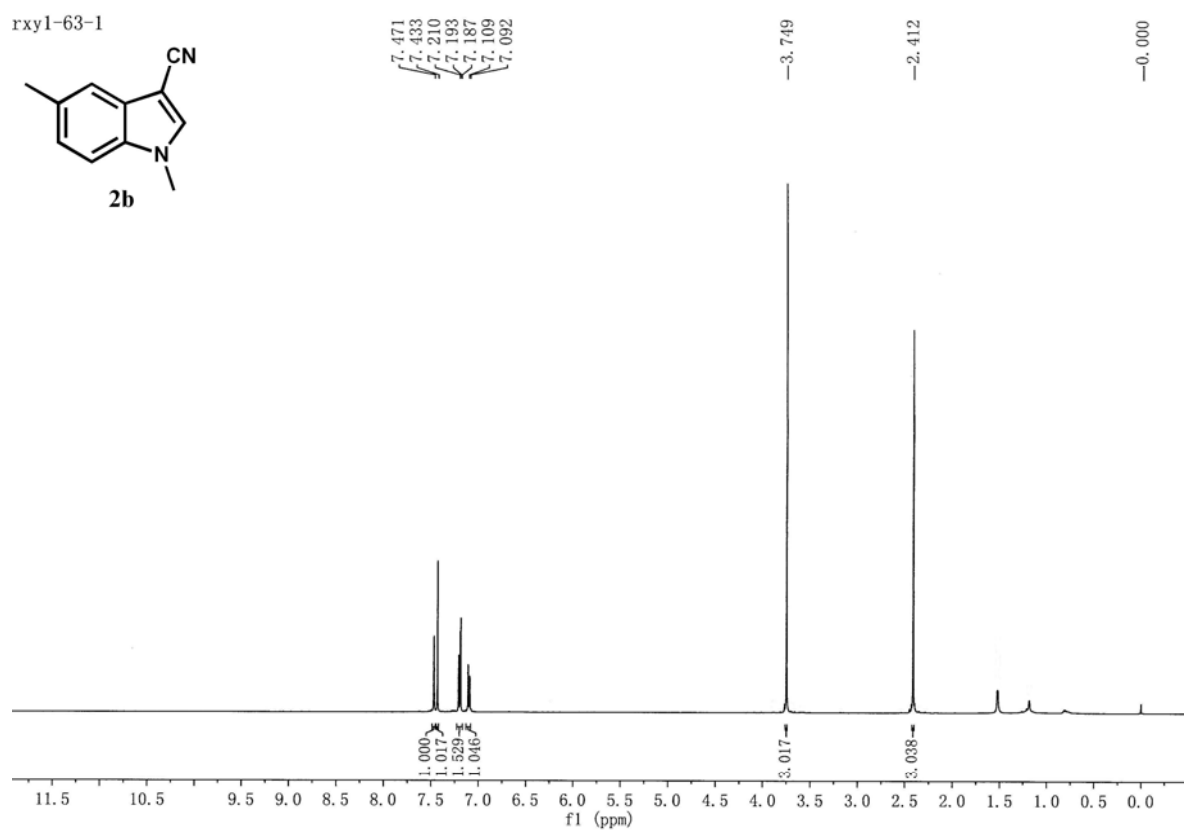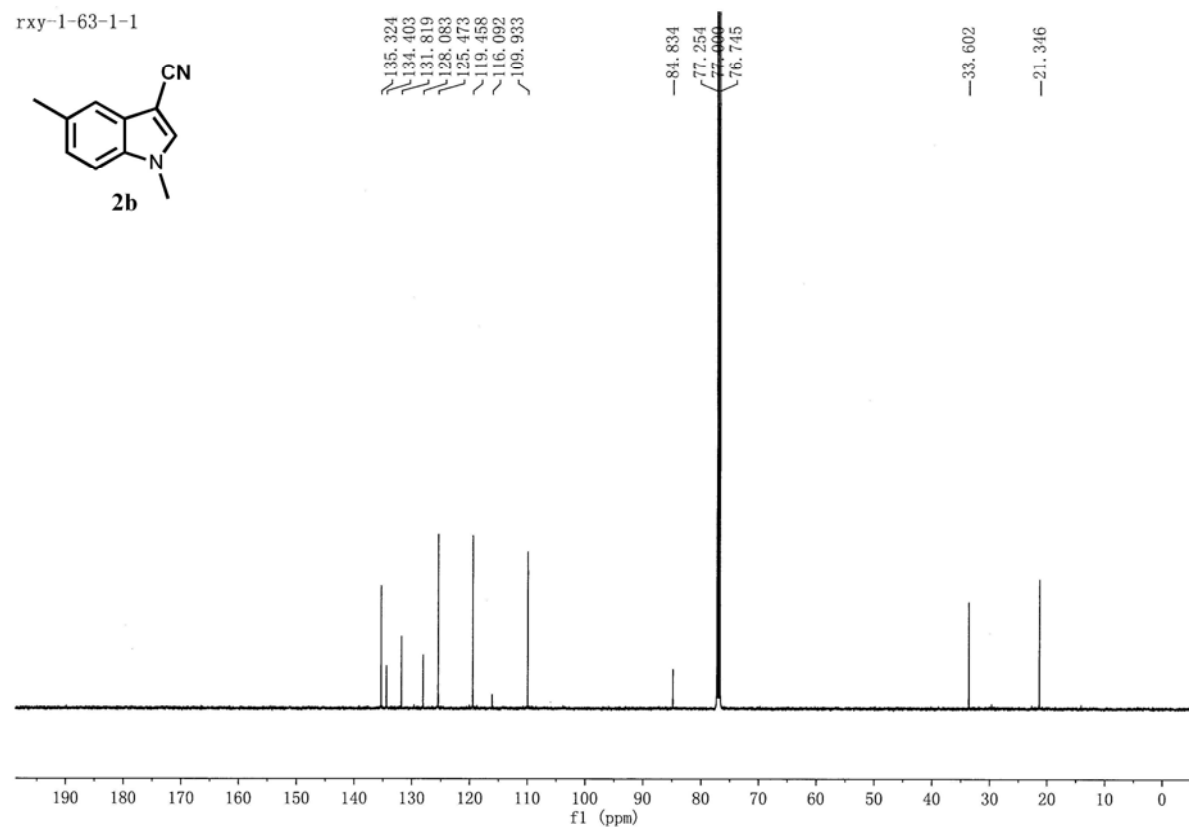

S11

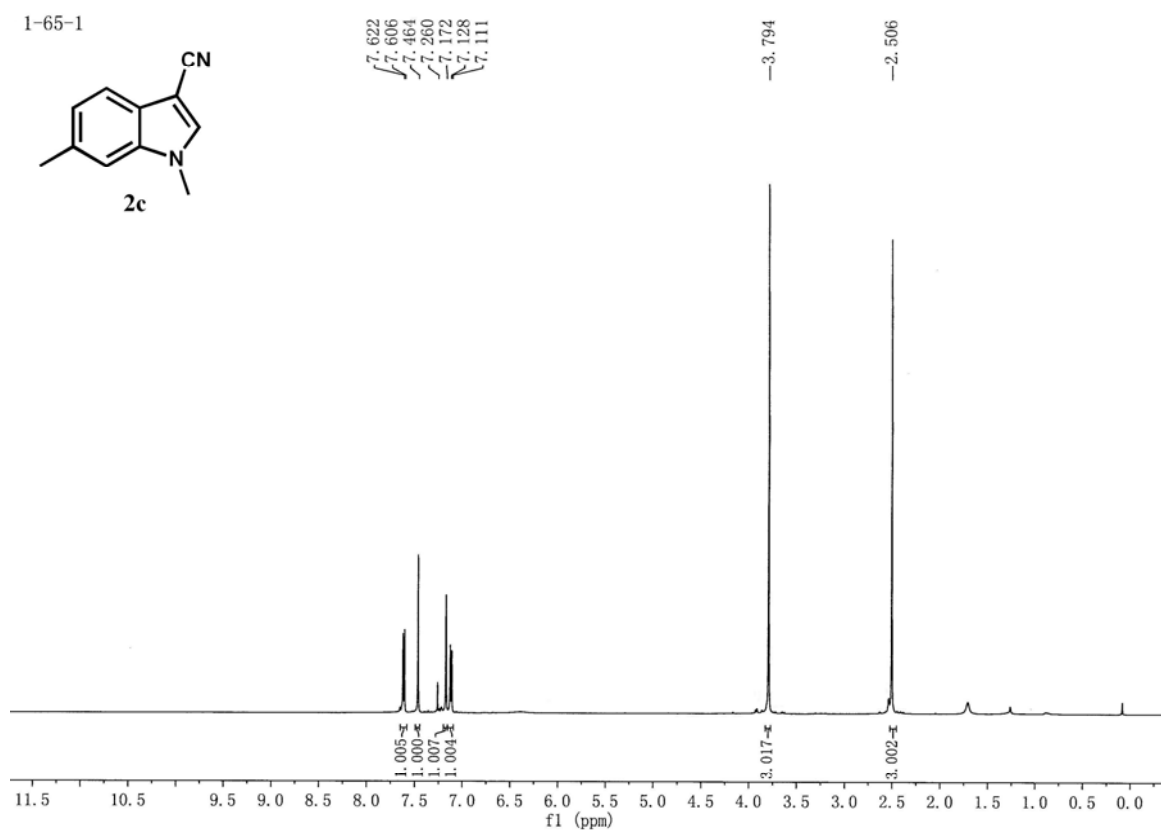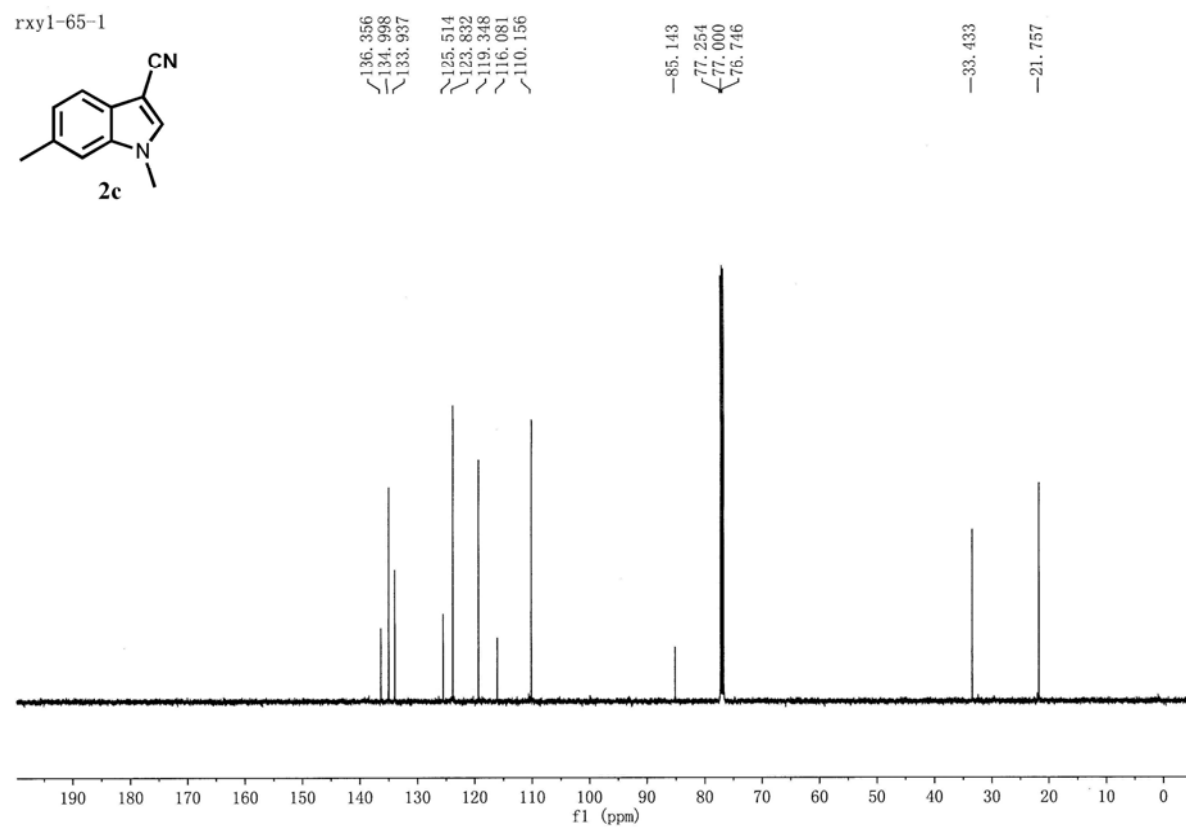

S12

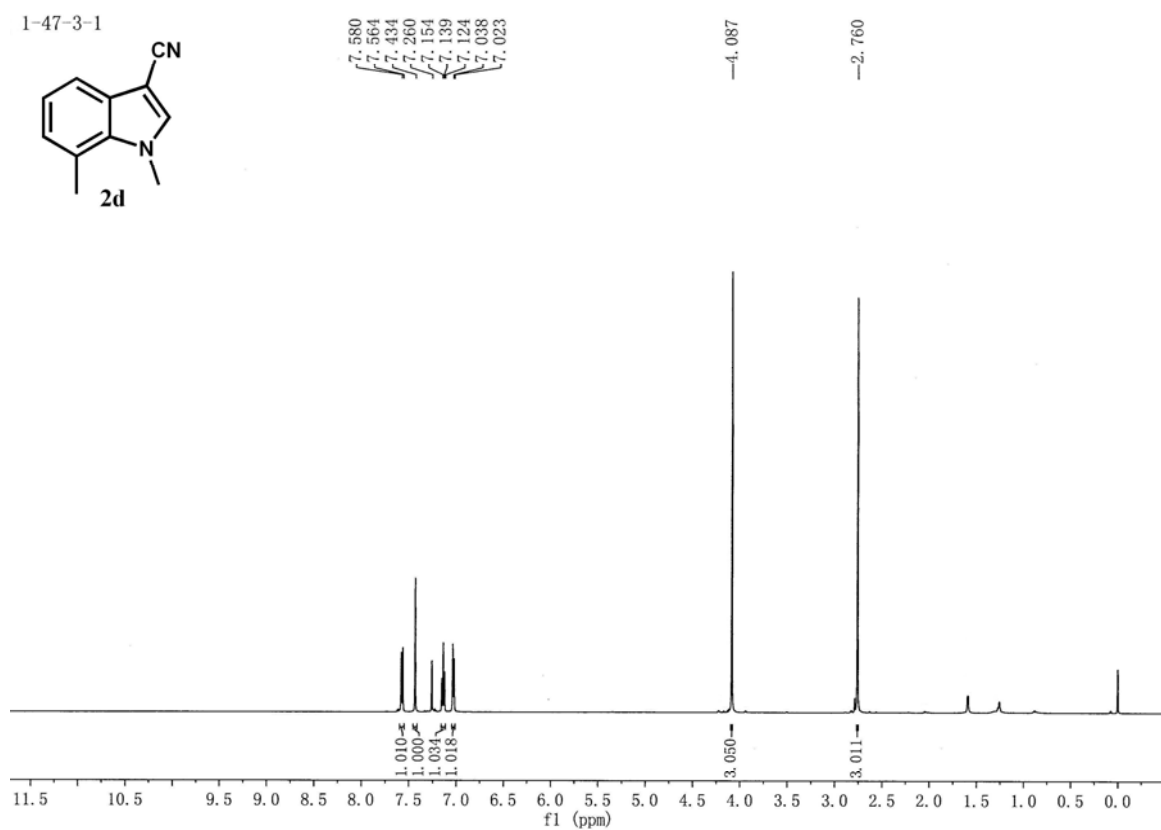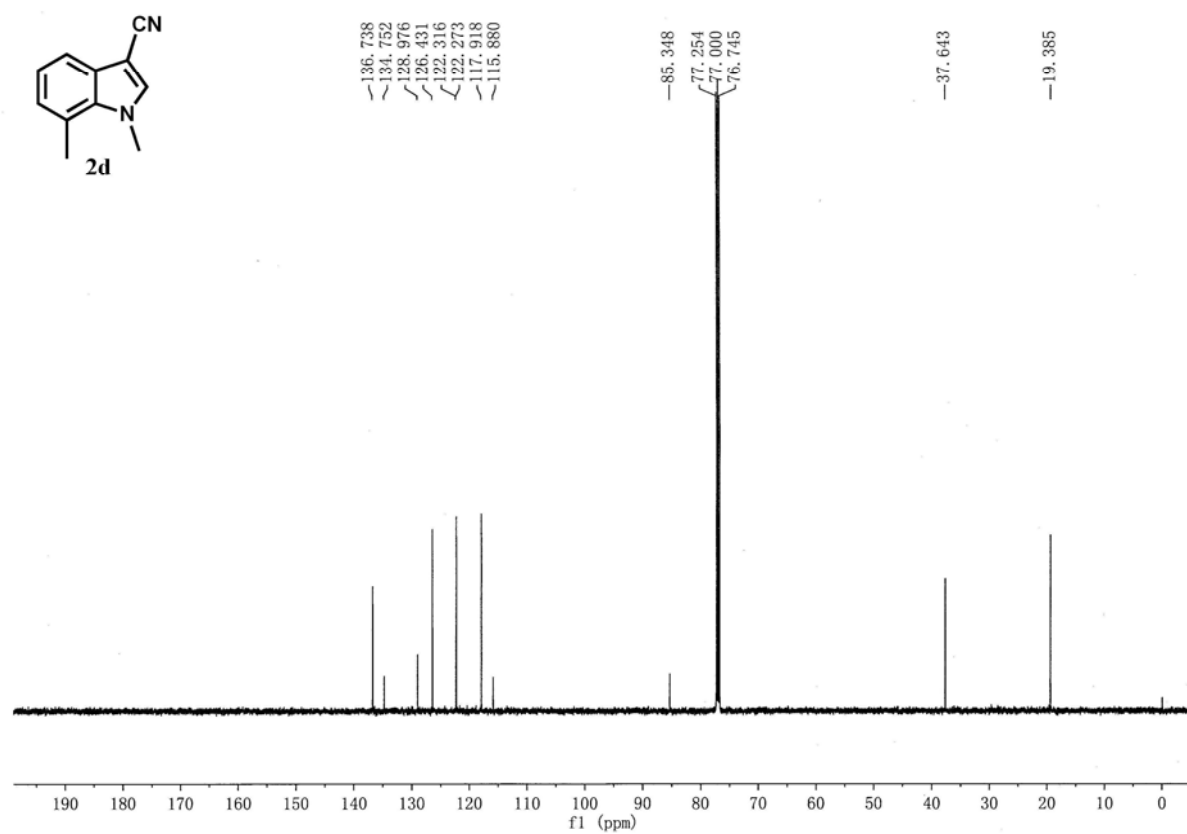

S13

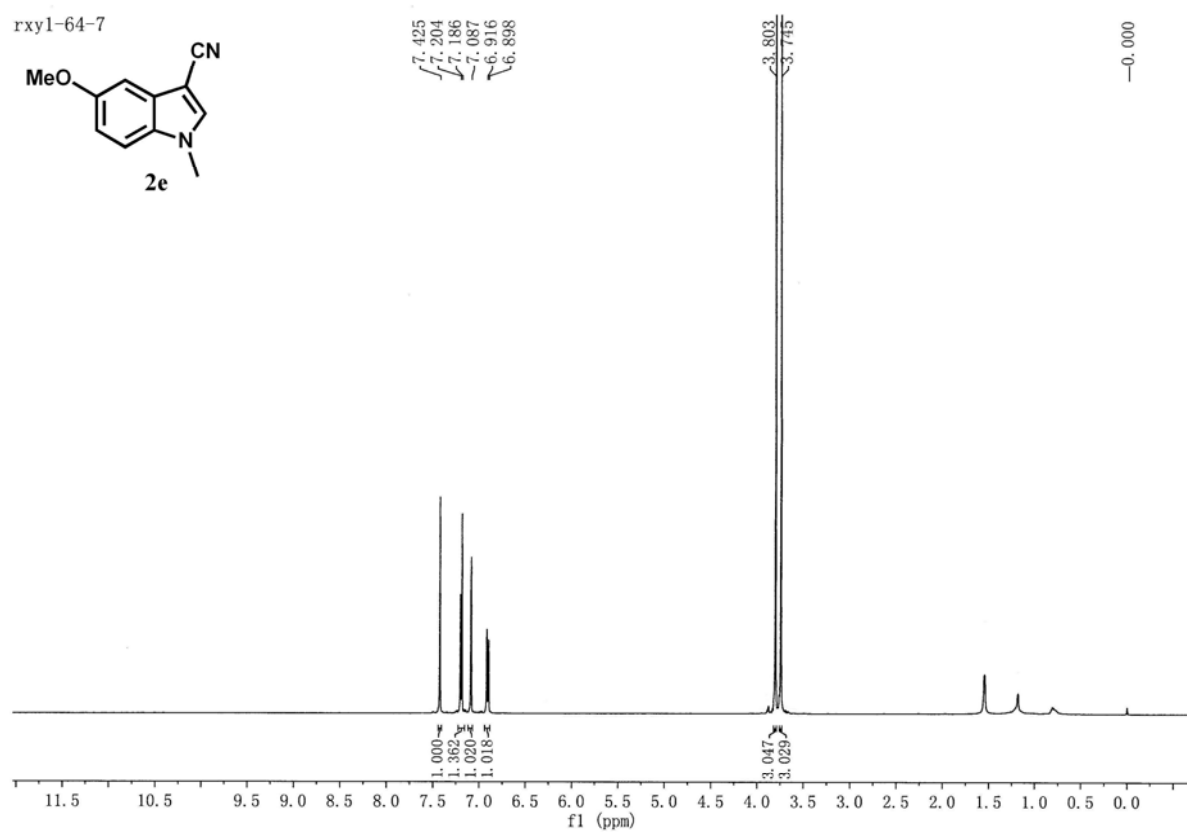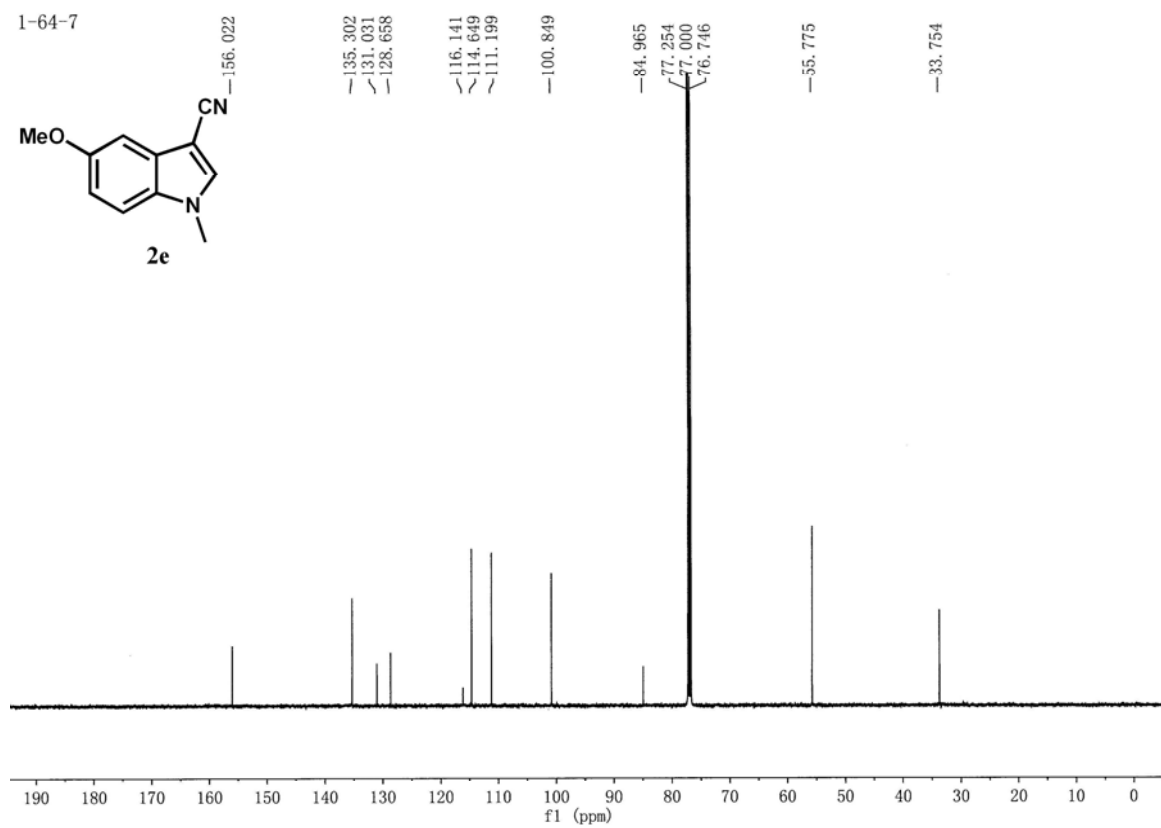

S14

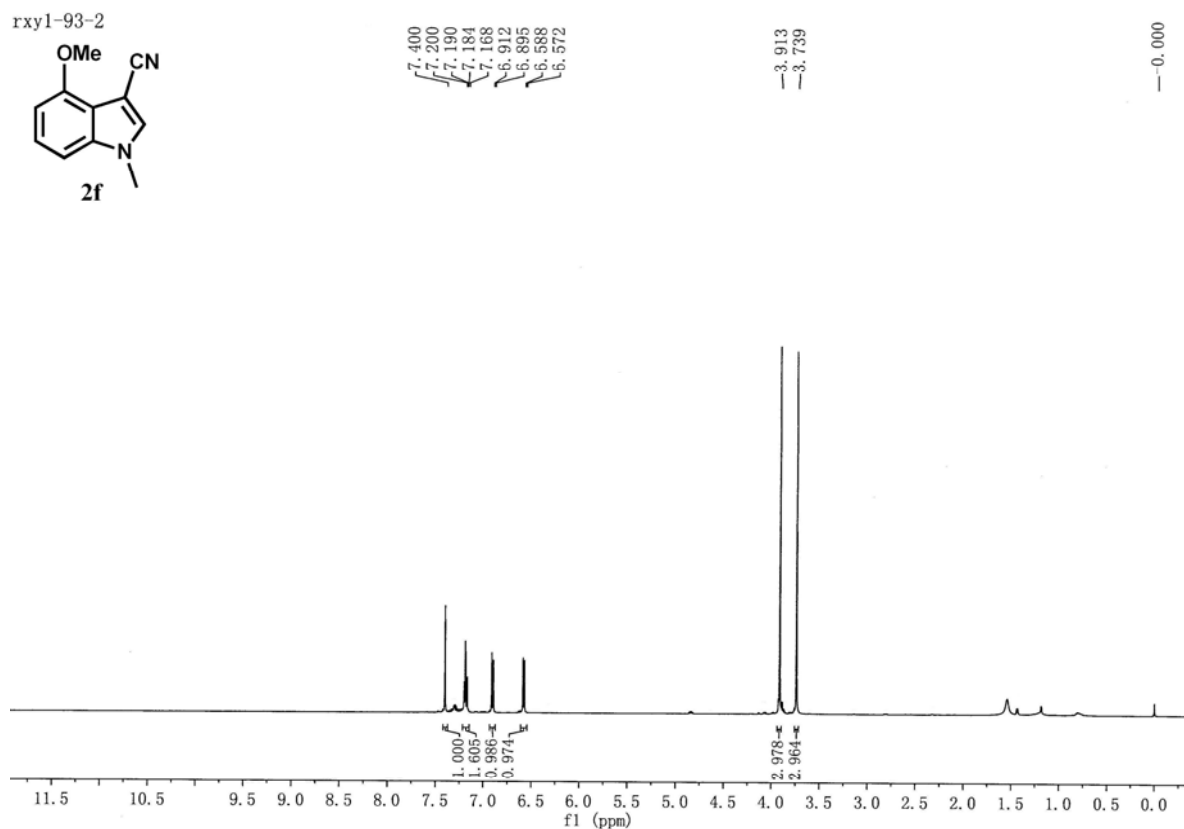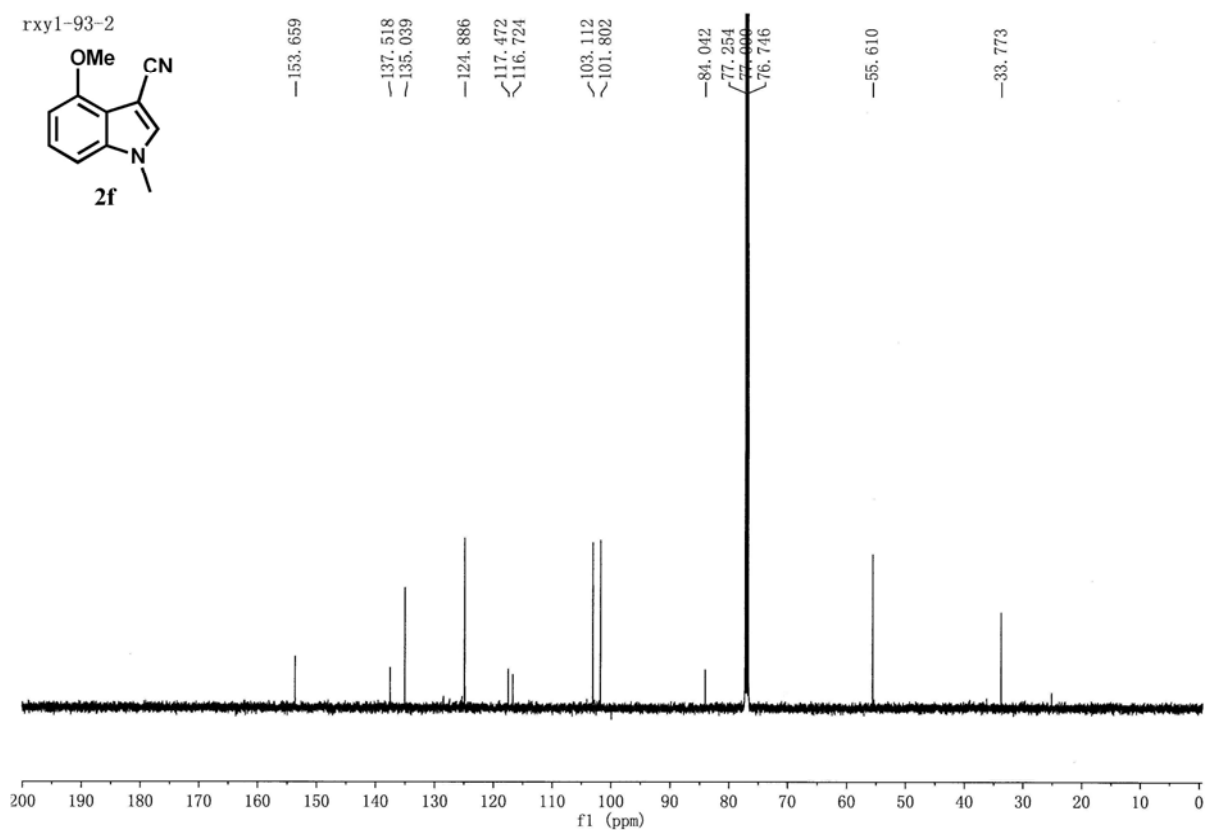

S15

rxxy2-13-1

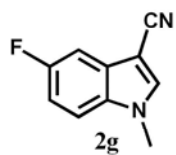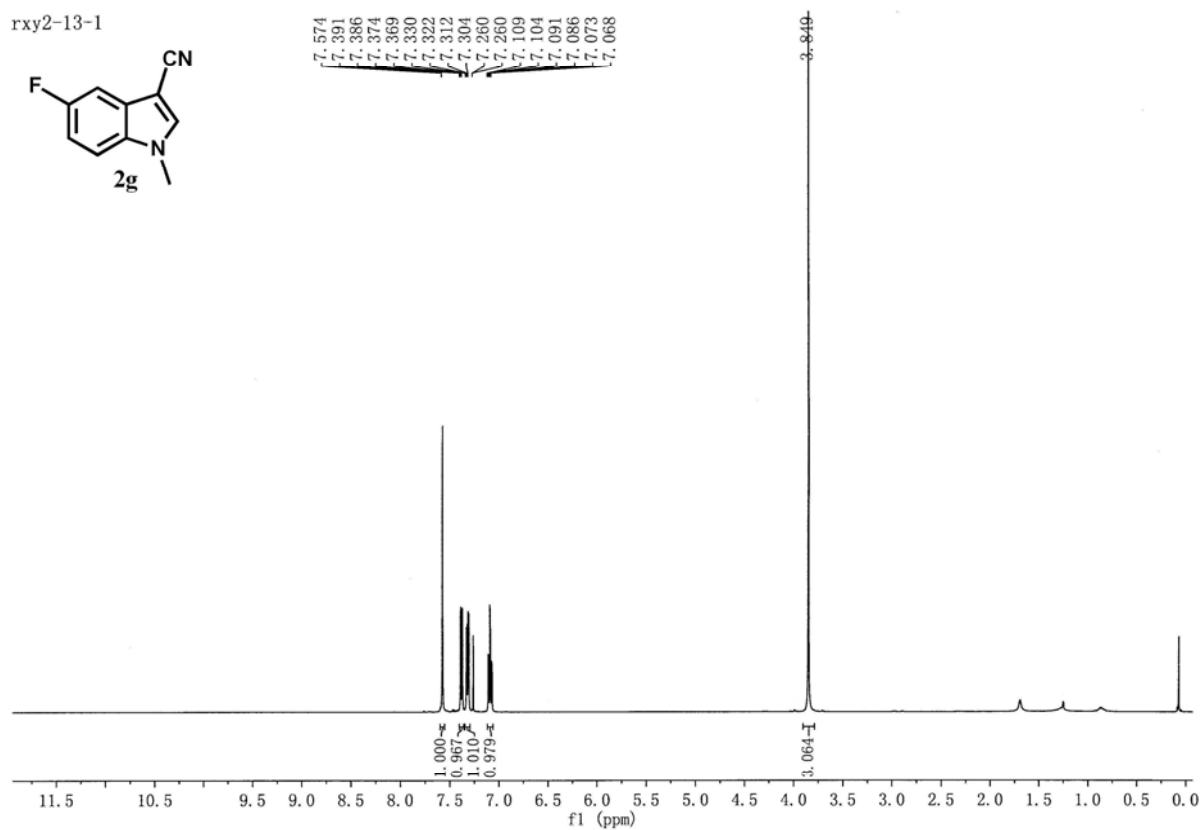

rxxy2-13-1

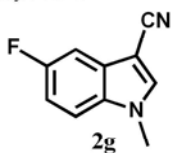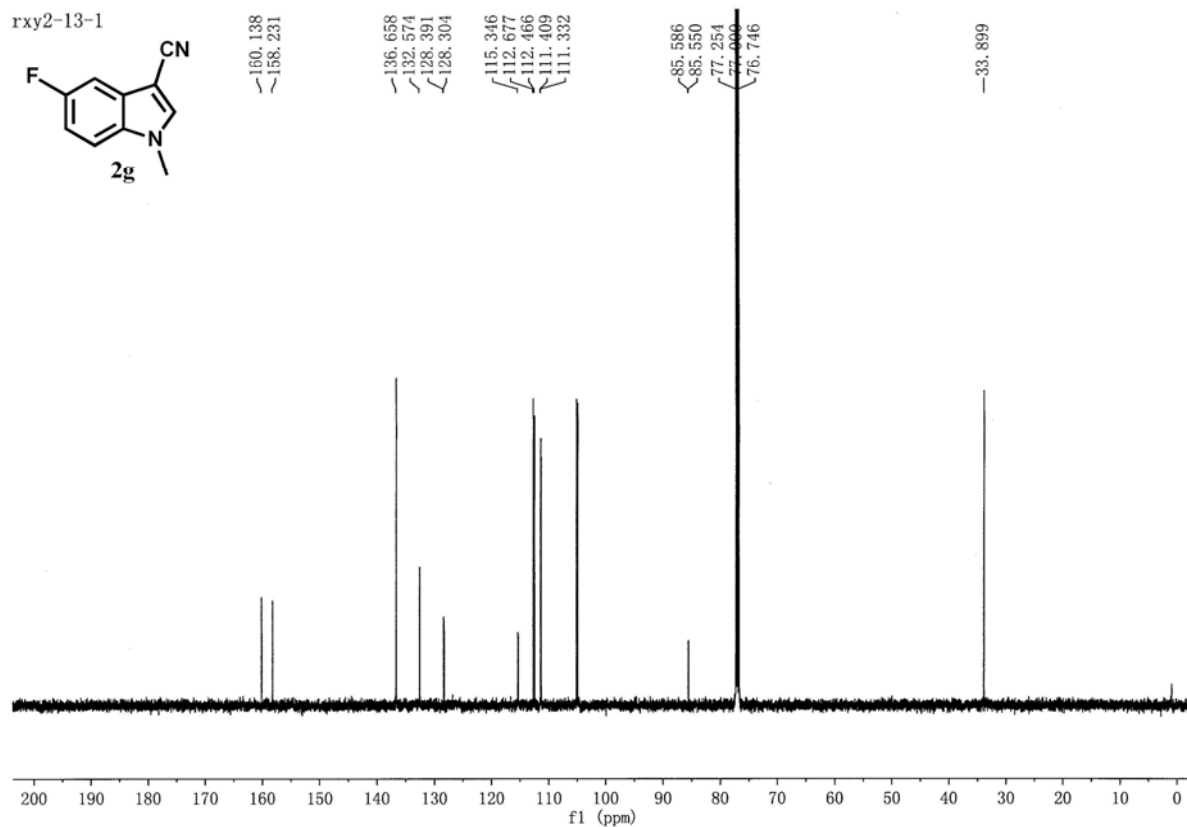

S16

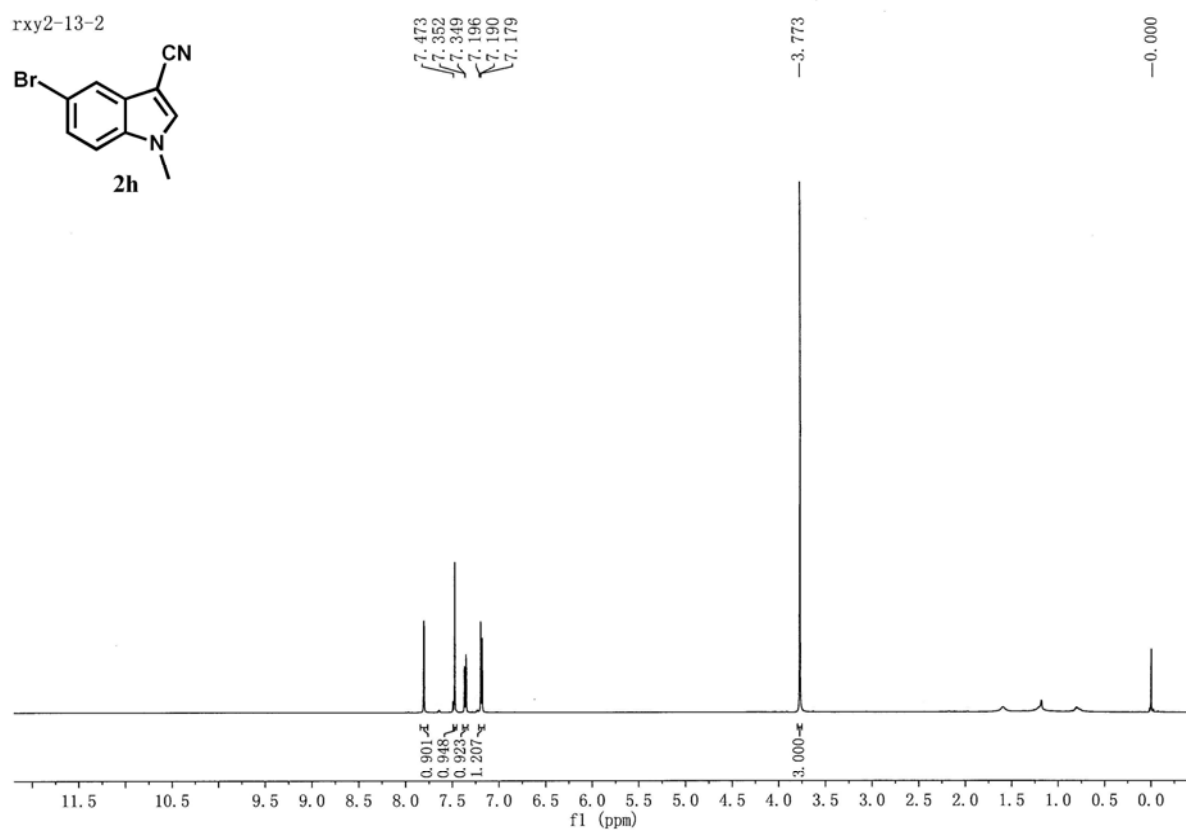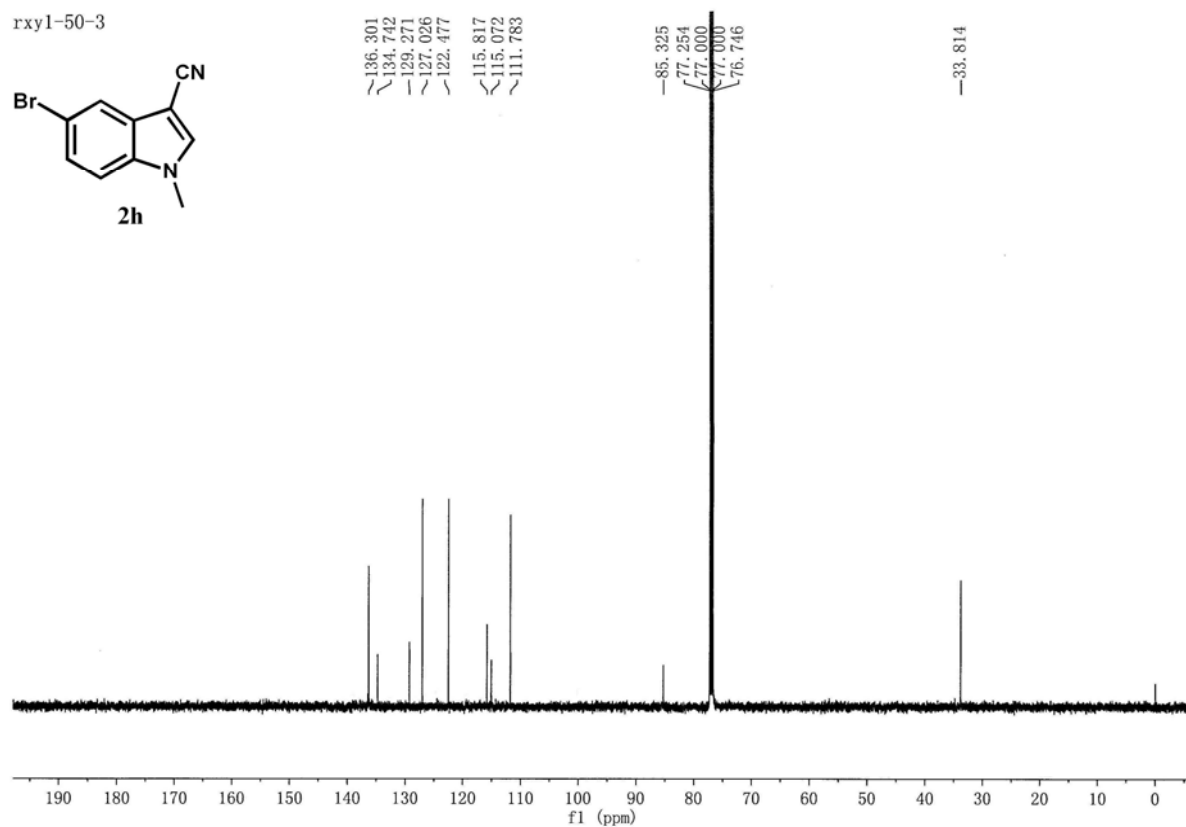



S17

rxyl50-4

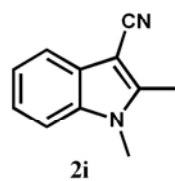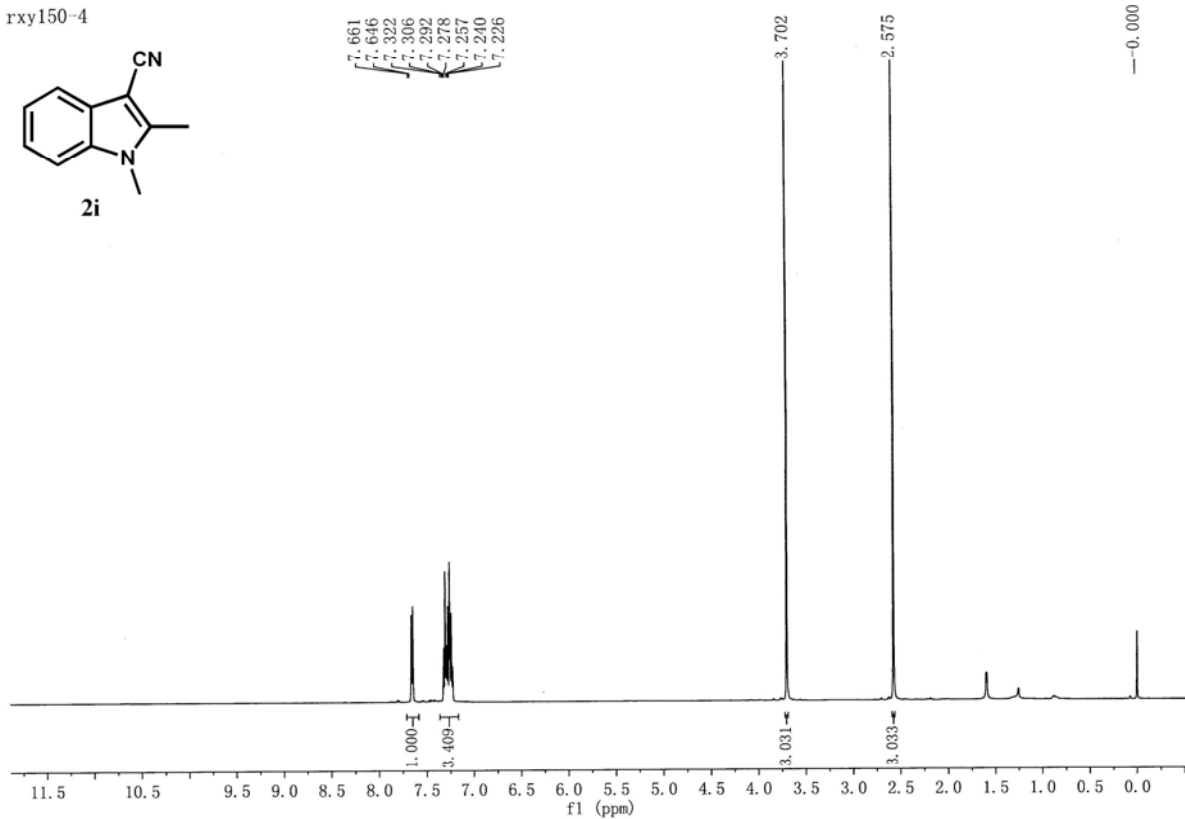

150-4

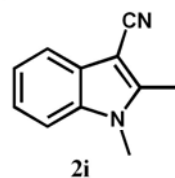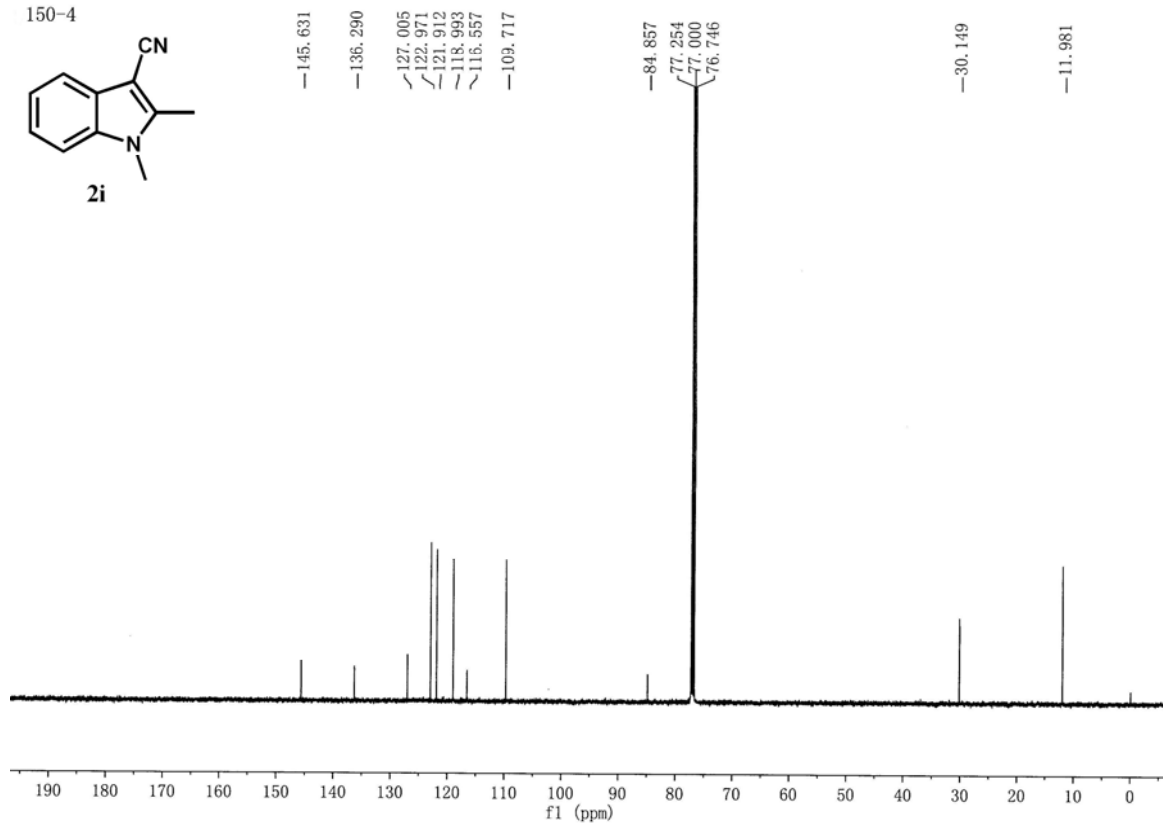

S18

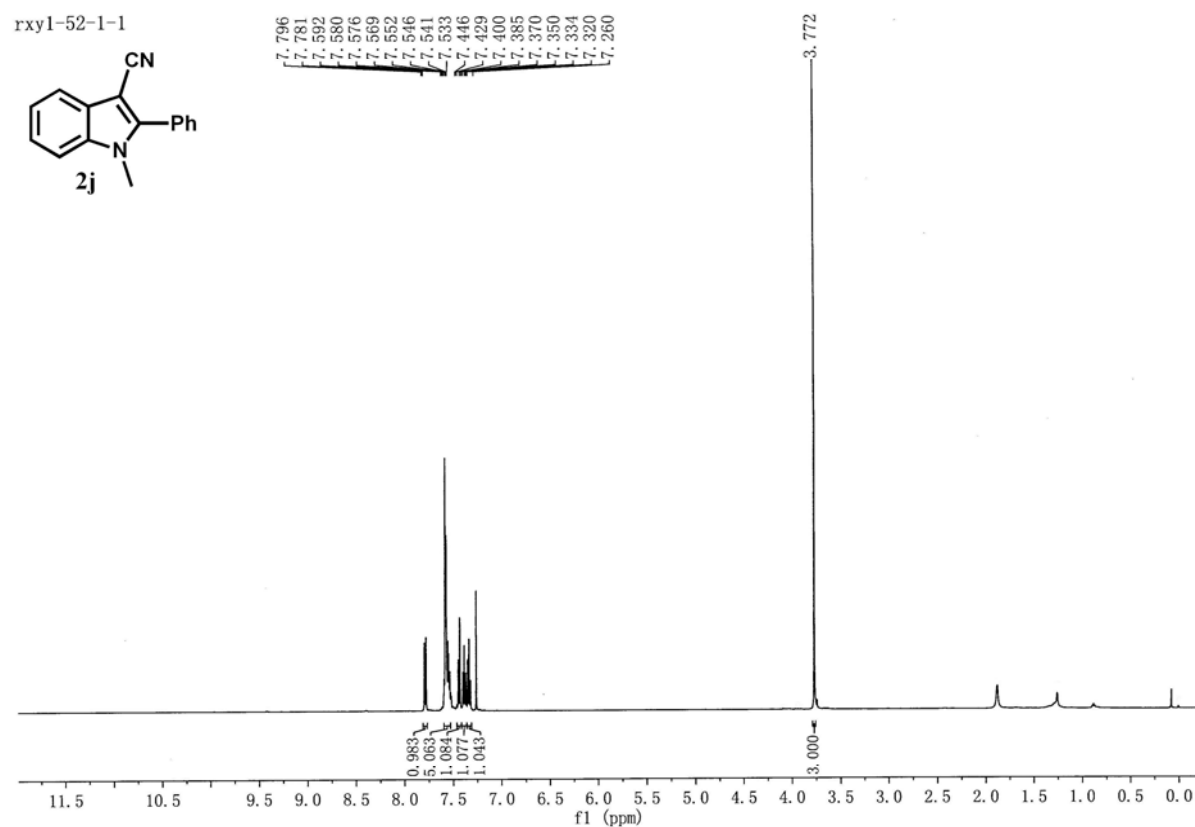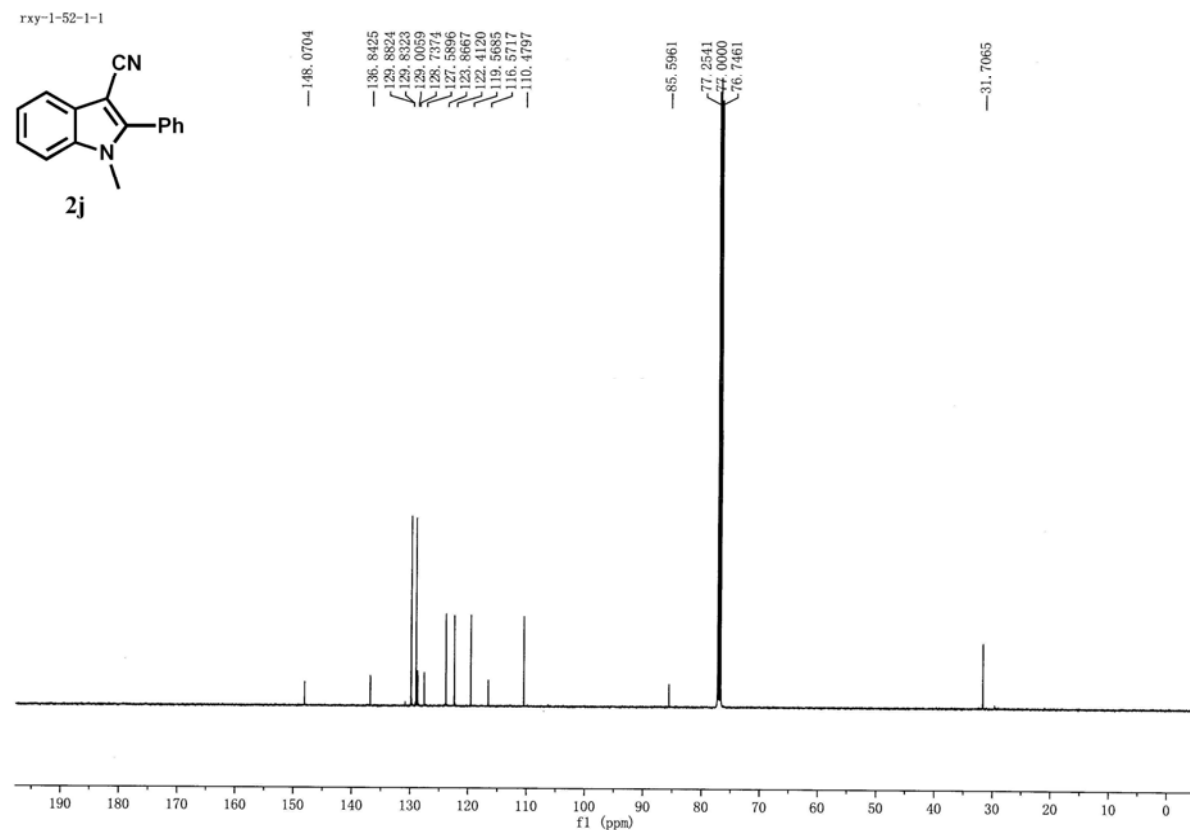

S19

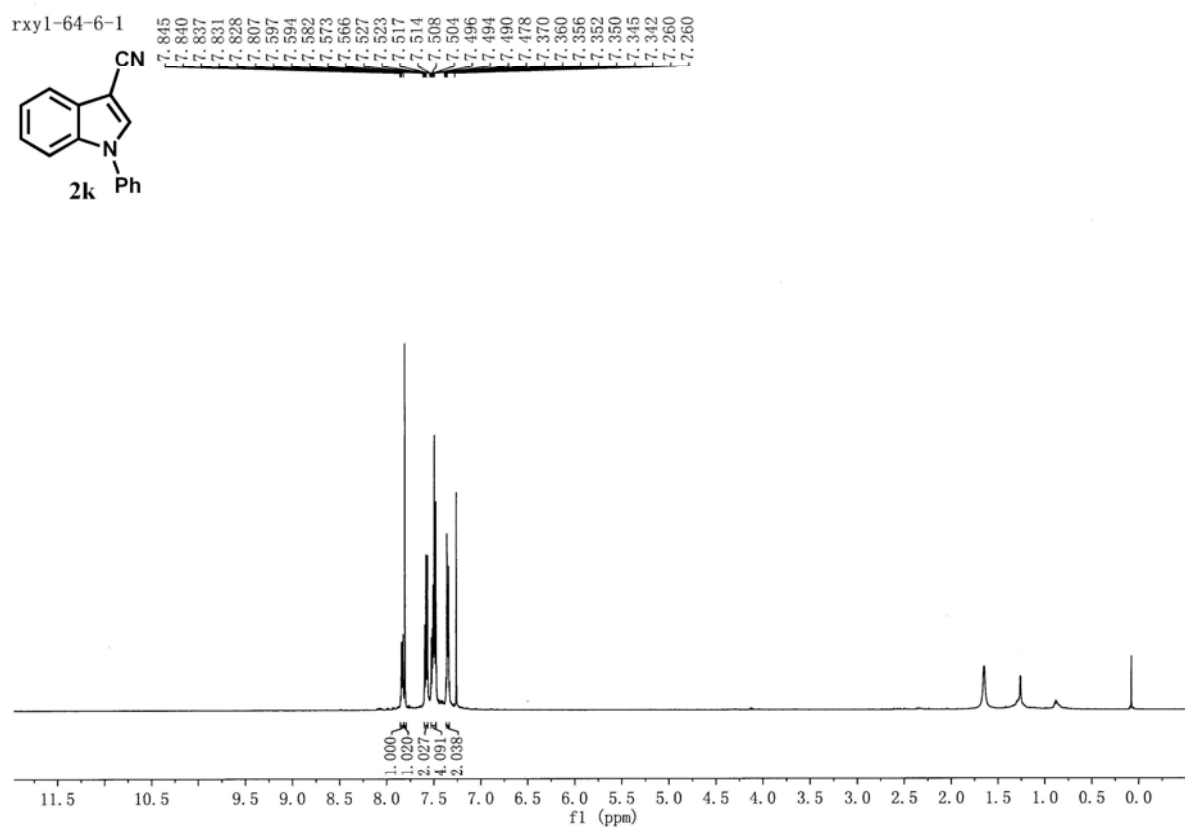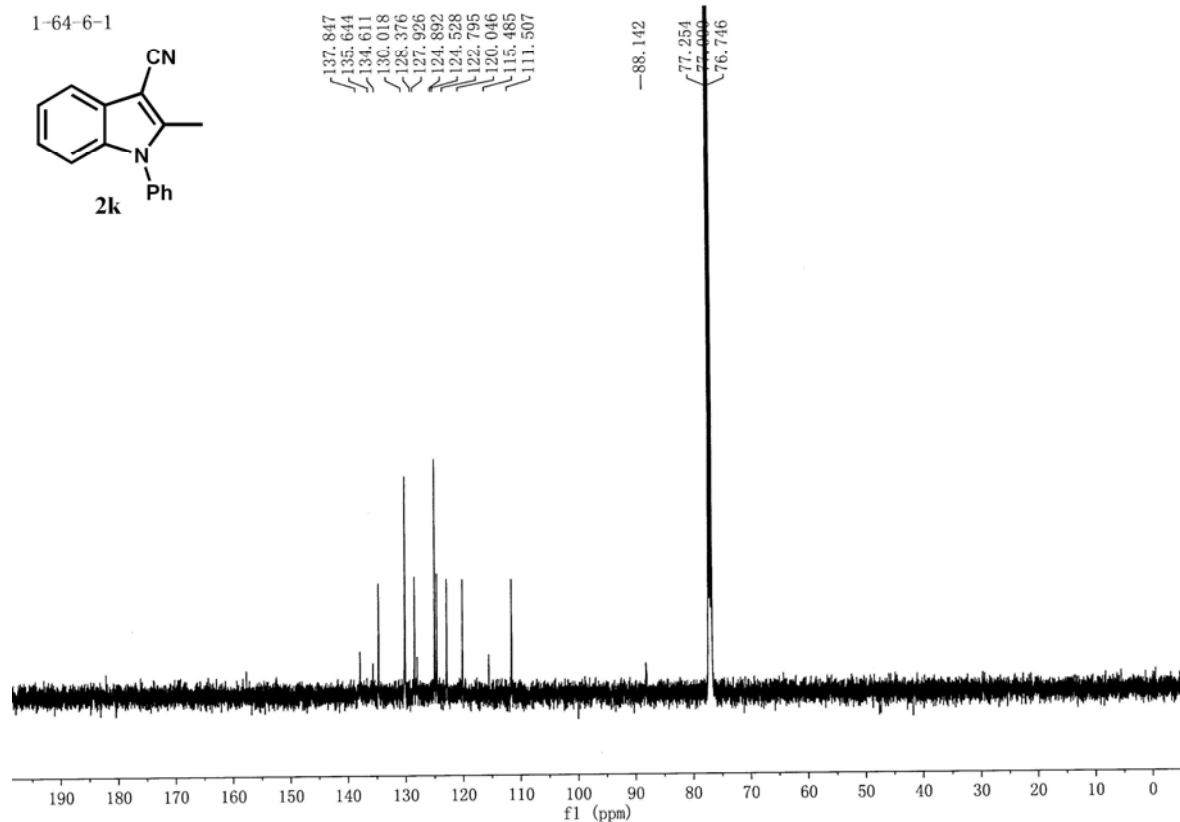

S20

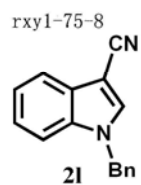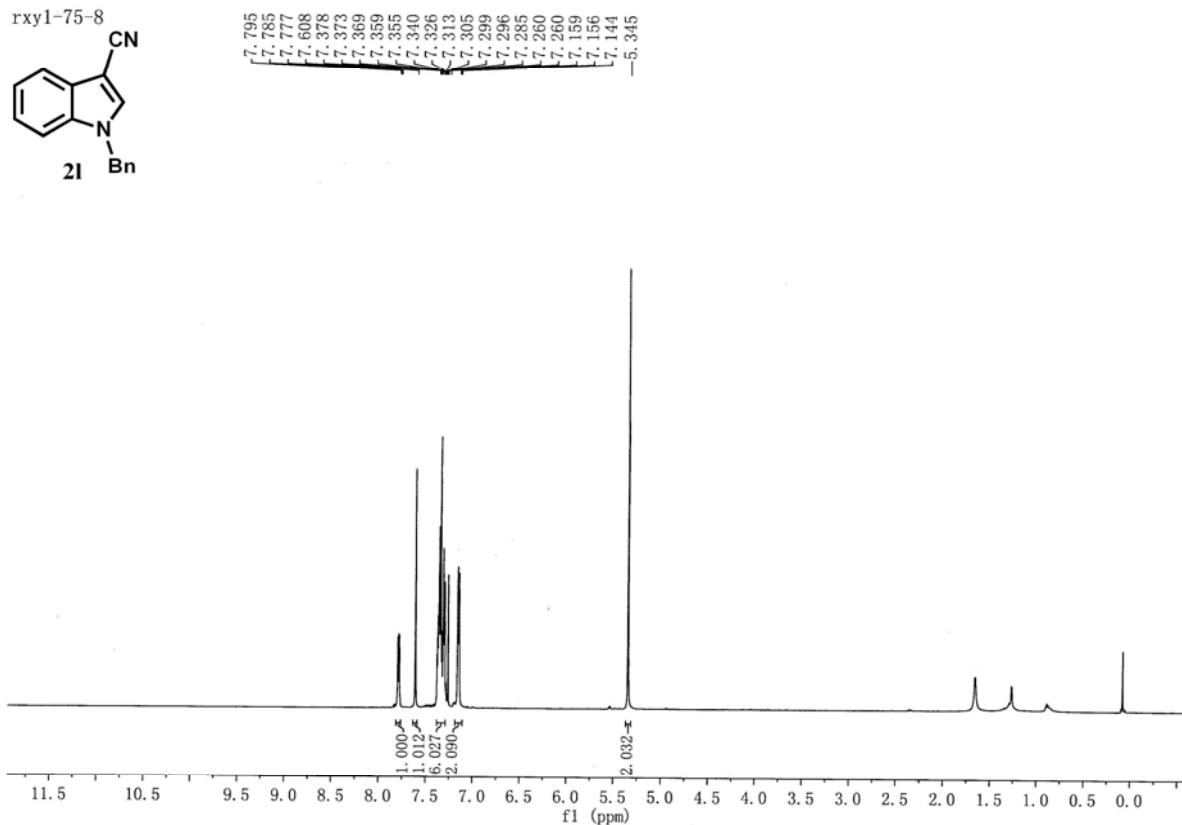

rxyl-75-8

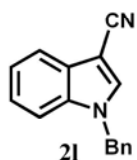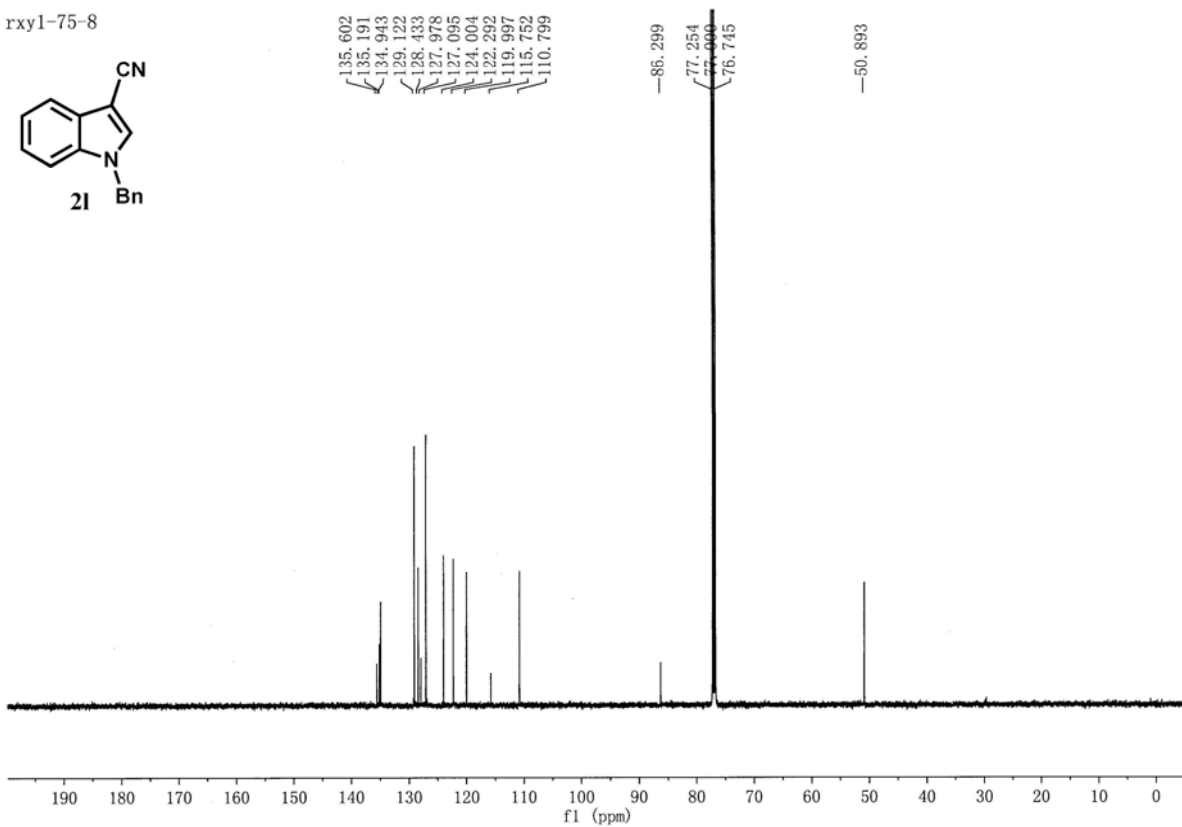

S21

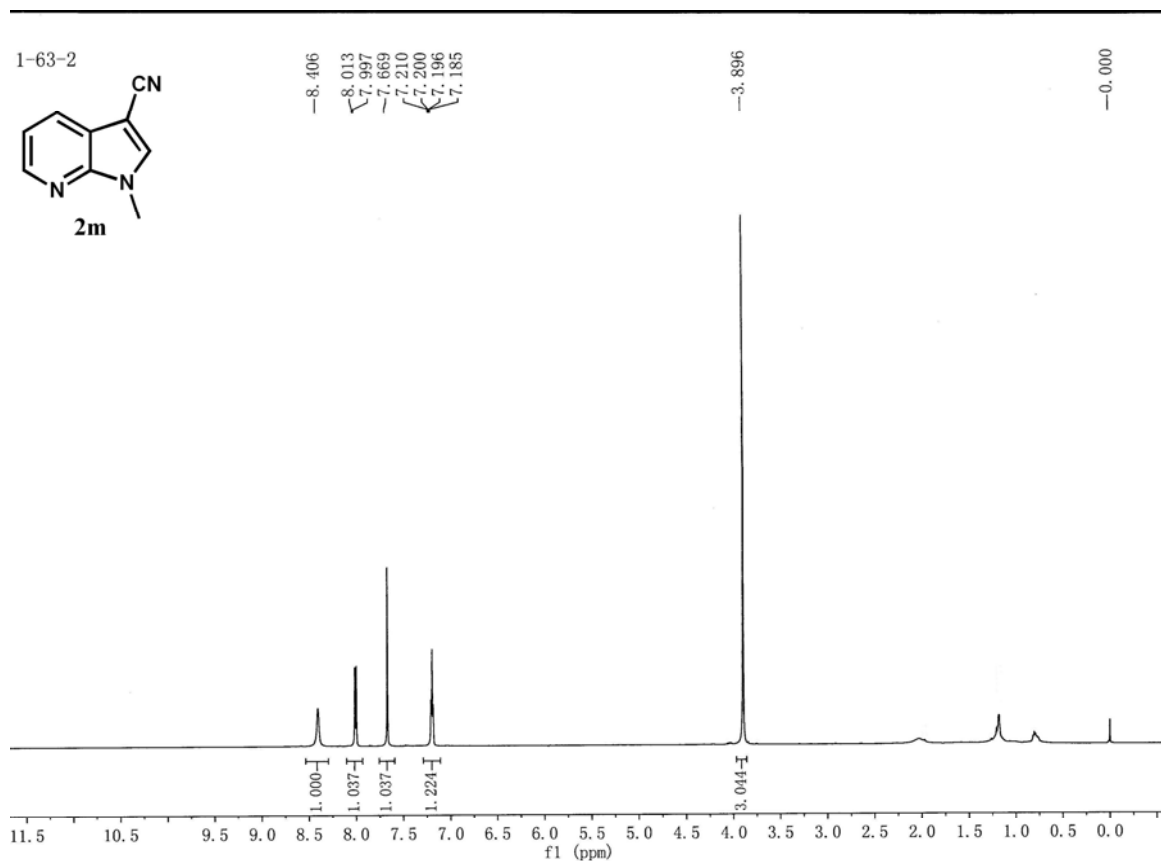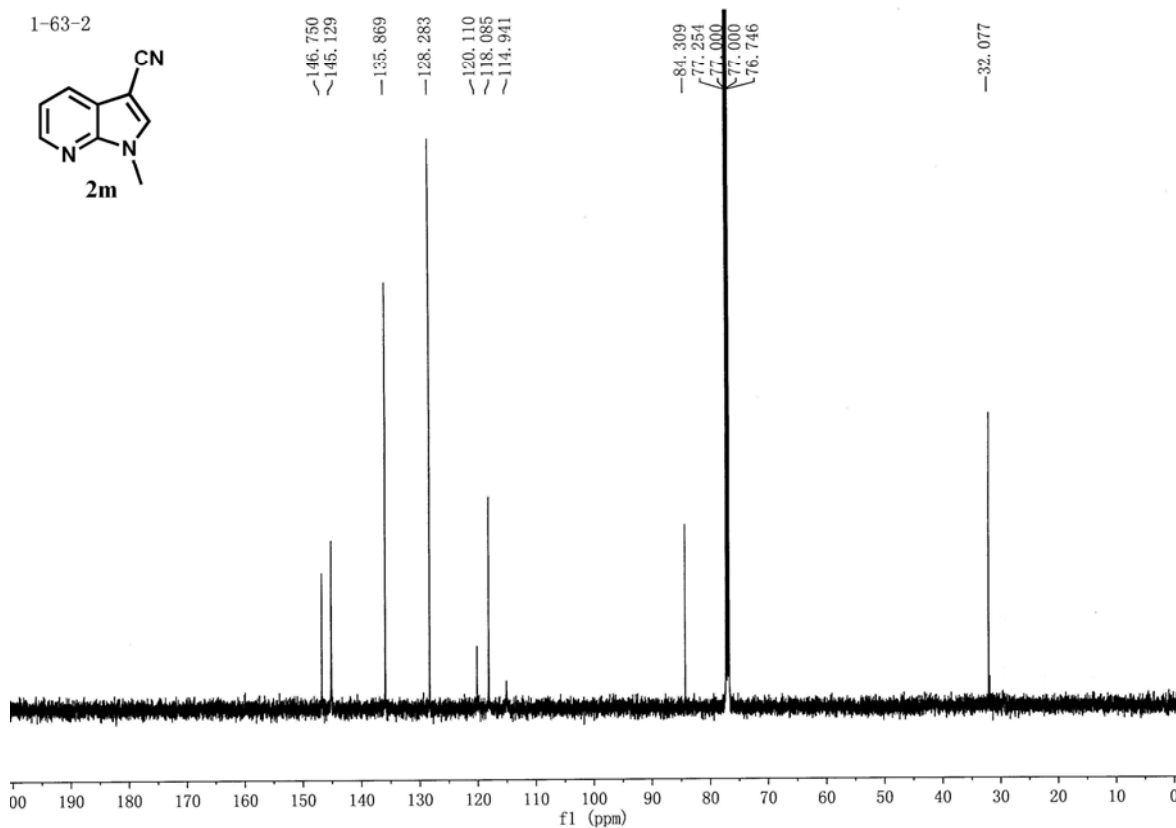

S22

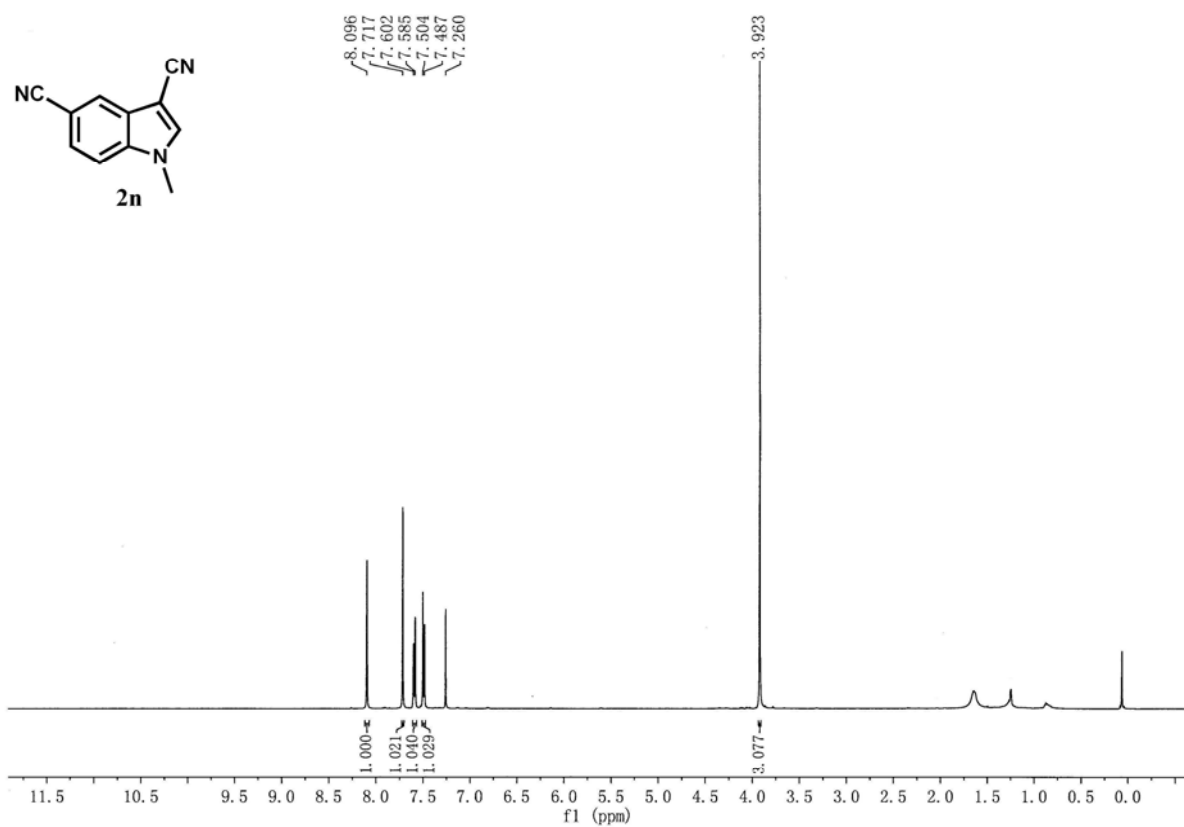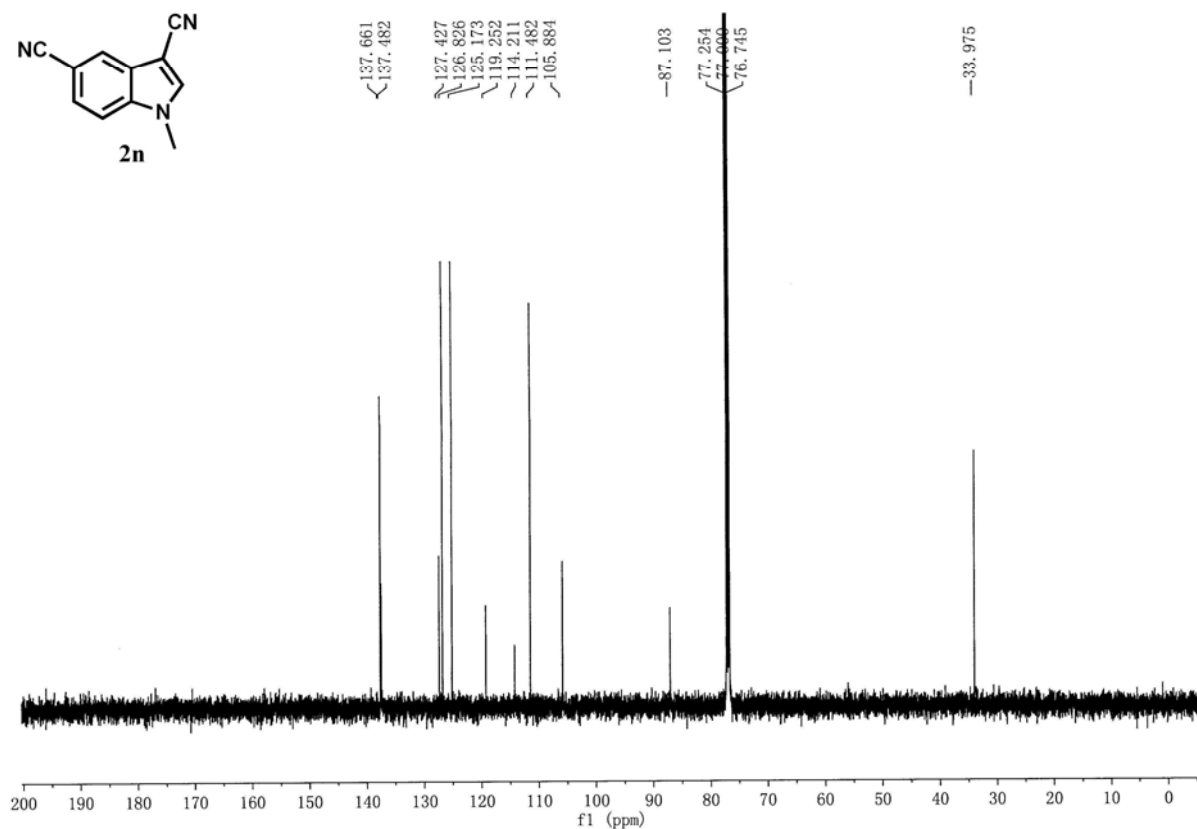

S23

rxyl-90-2-1

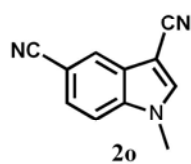

8.096  
7.717  
7.602  
7.585  
7.504  
7.487  
7.260

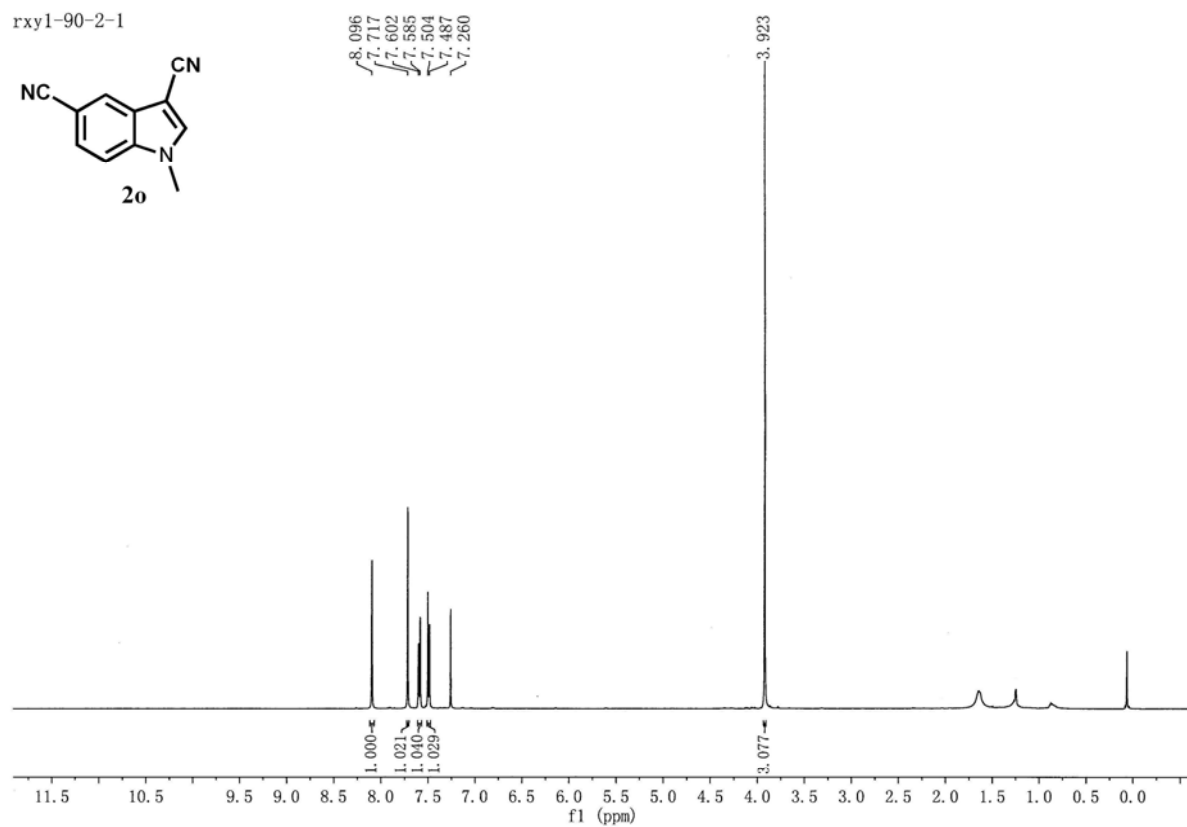

rxyl-90-2-1

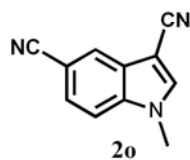

137.661  
137.482

127.427  
126.826  
125.173  
119.252  
114.211  
111.482  
105.884

87.103

77.254  
77.000  
76.745

33.975

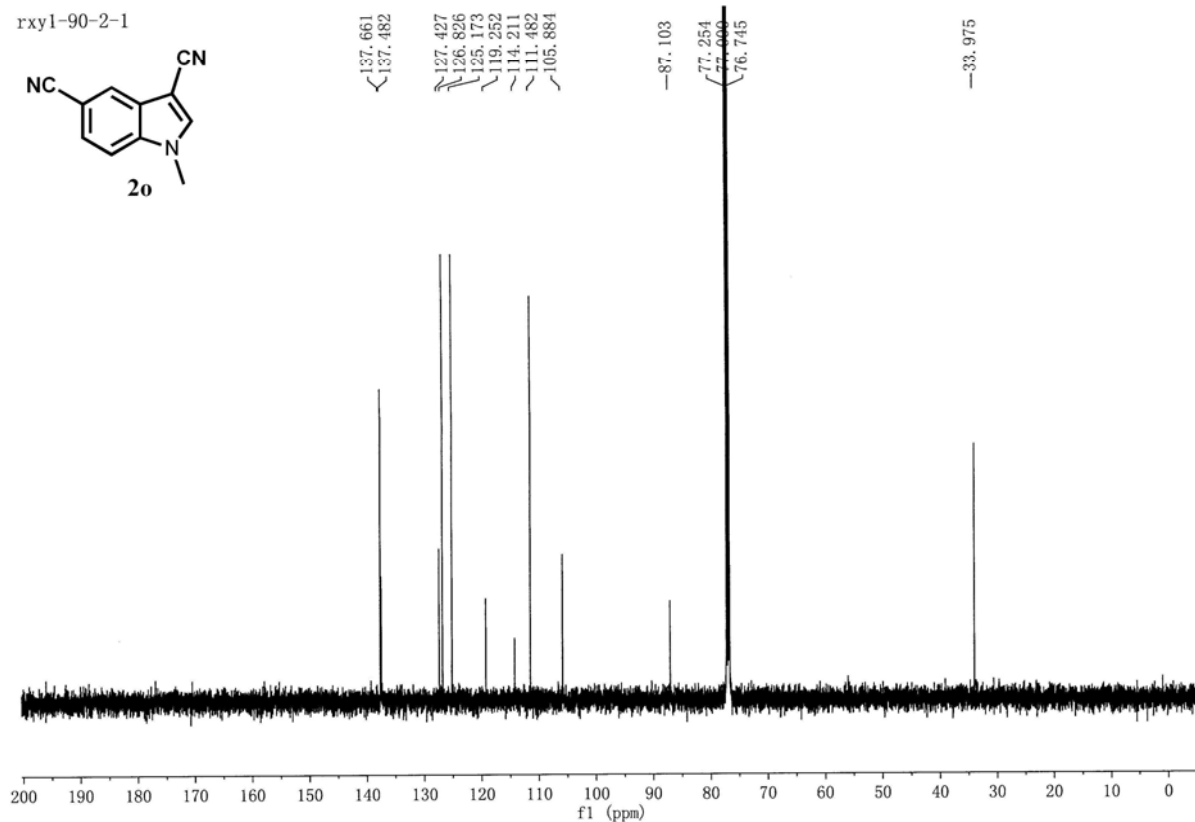

S24

rxyl-72-5

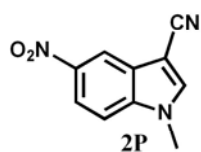

8.721  
8.278  
8.260  
7.754  
7.501  
7.482  
7.260

3.953

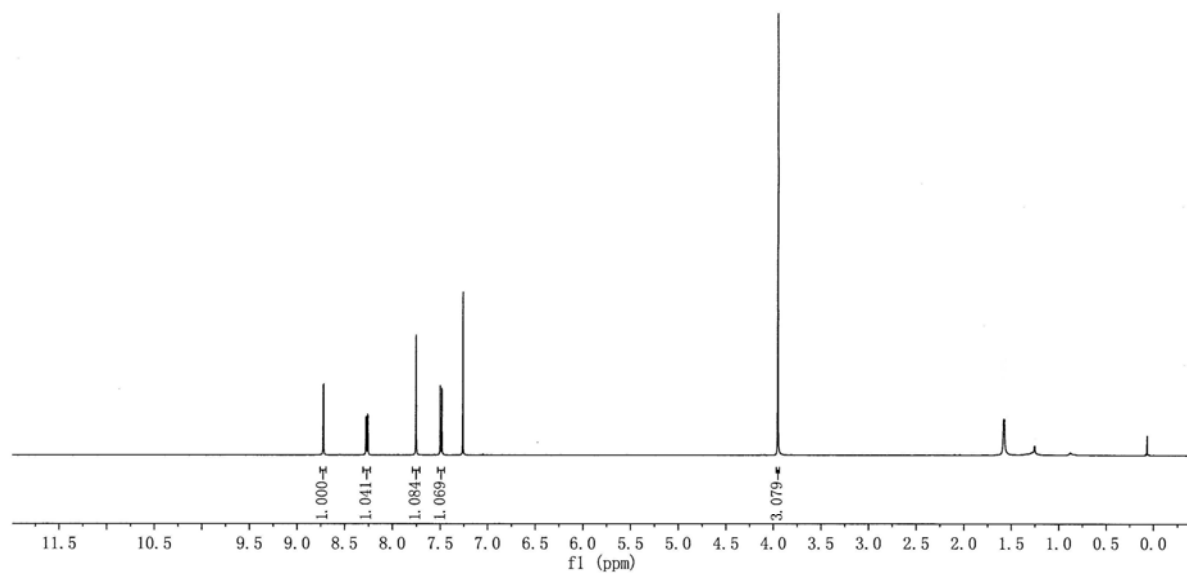

rxyl-72-5

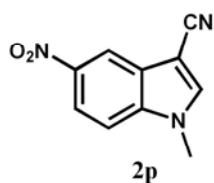

143.612  
138.631  
138.465  
127.088  
119.435  
116.884  
113.999  
110.761

88.647

77.254  
77.000  
76.746

34.208

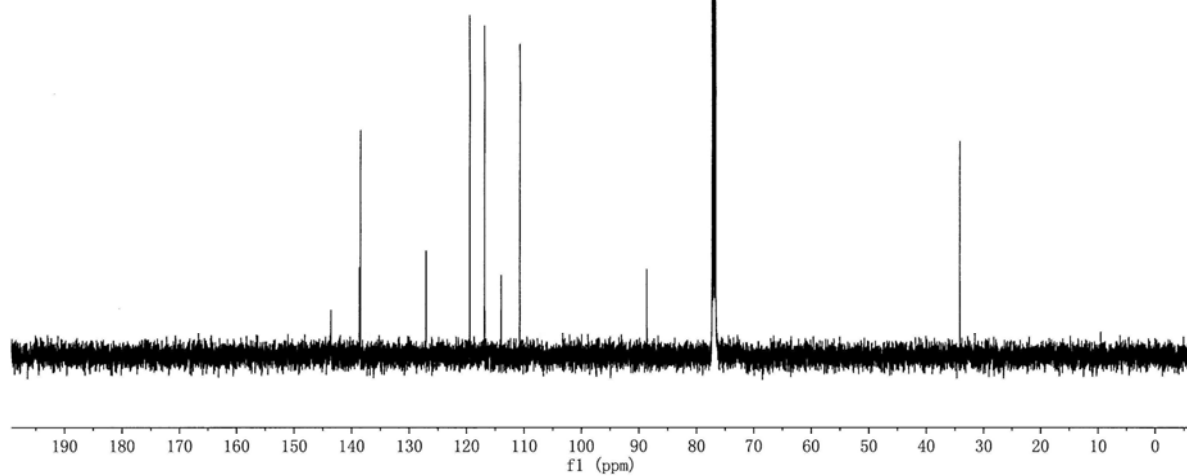



S25

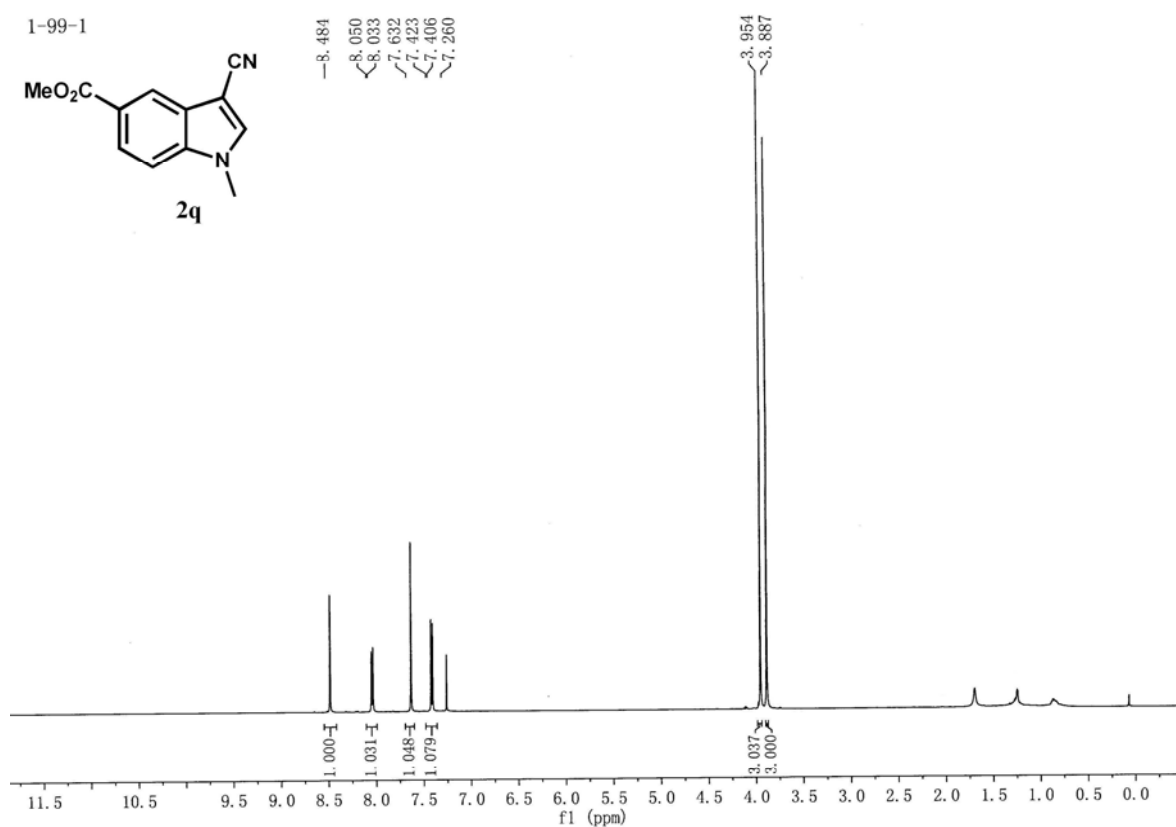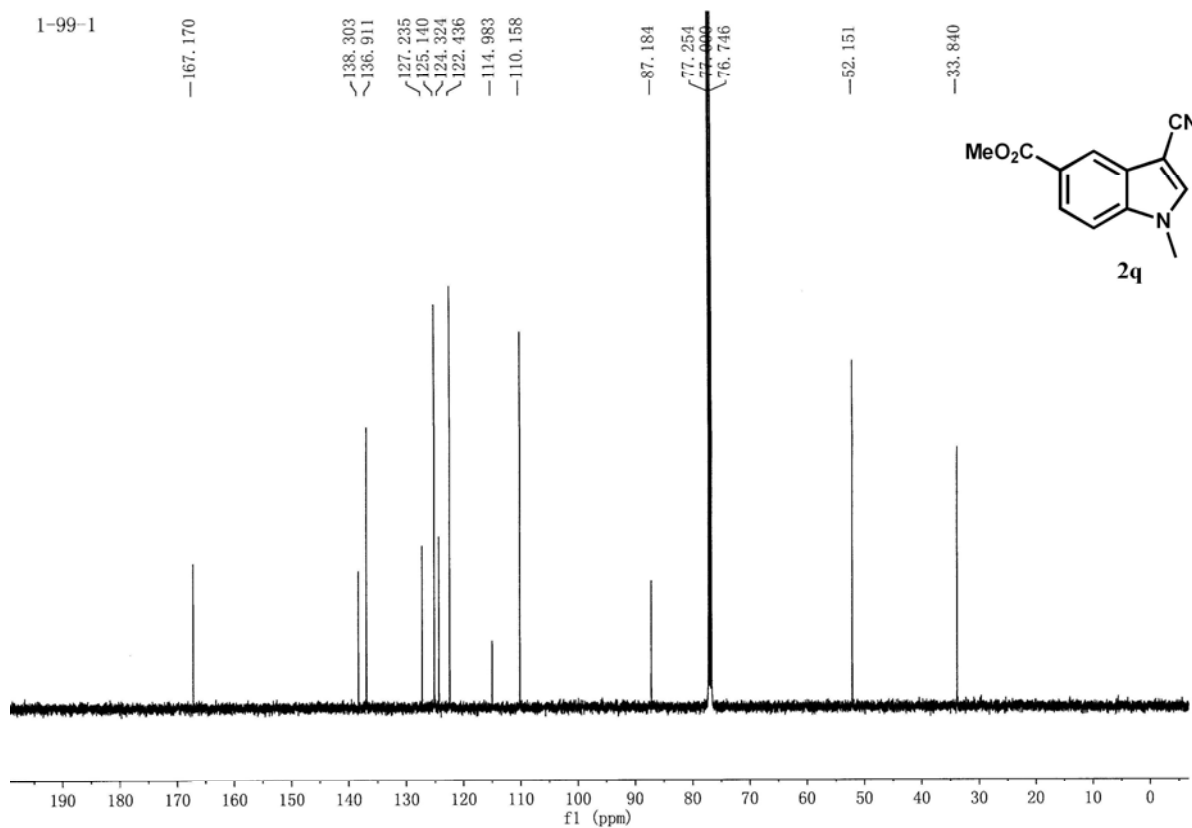

S26

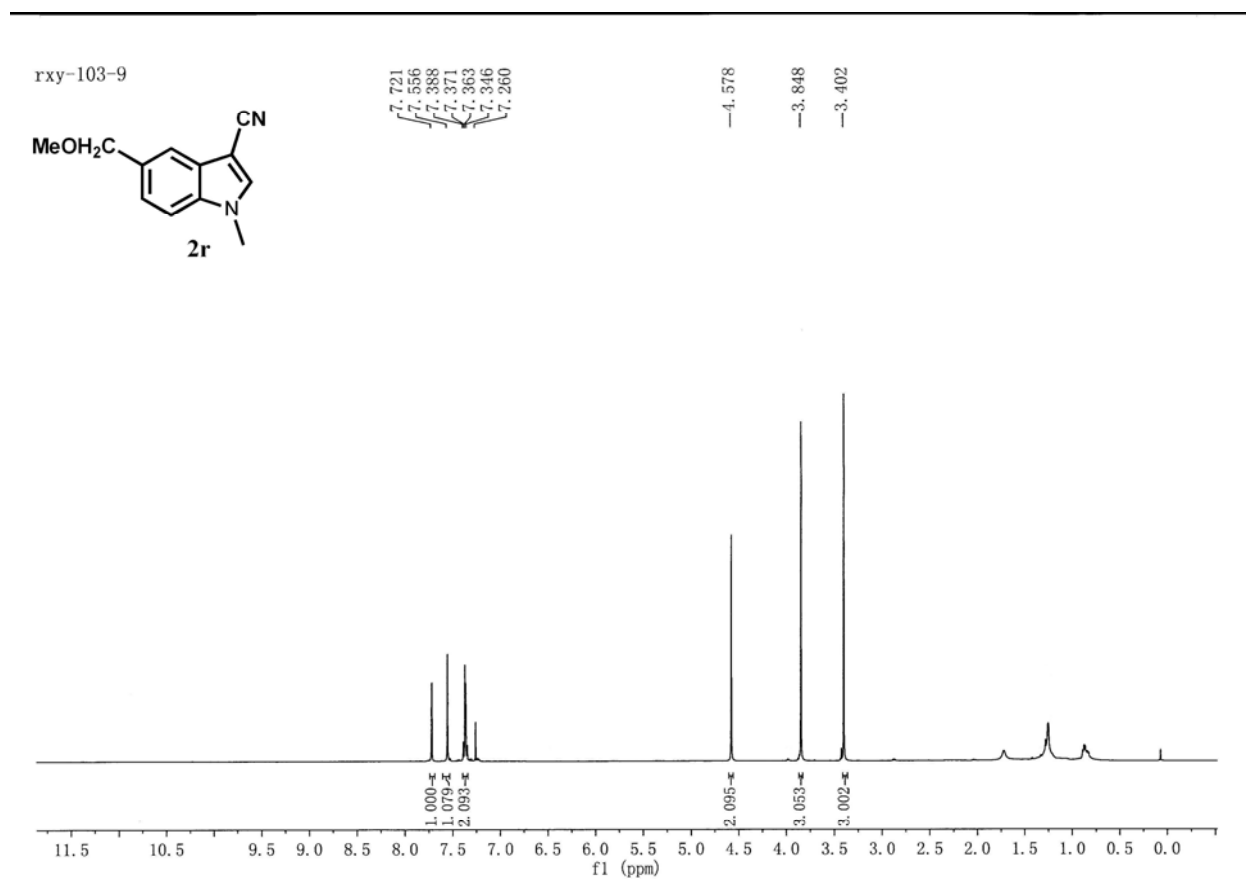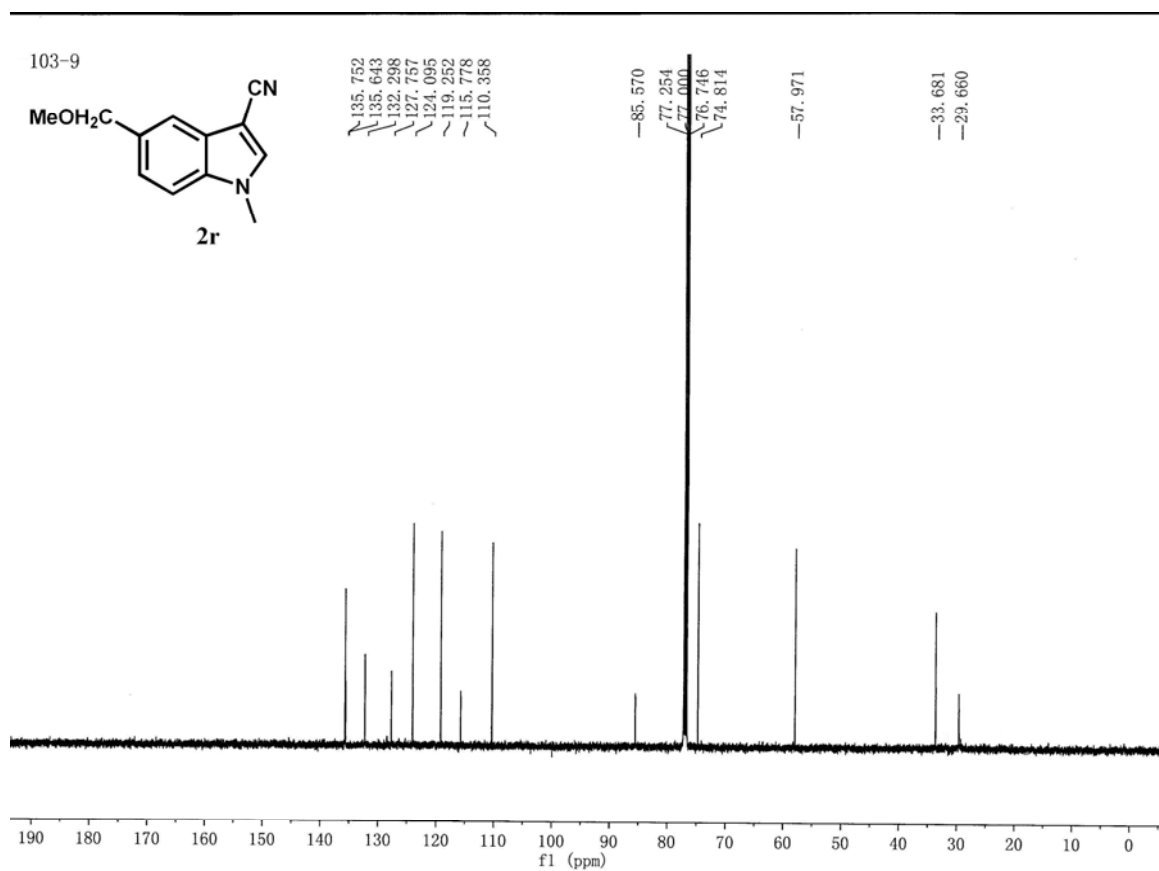

S27

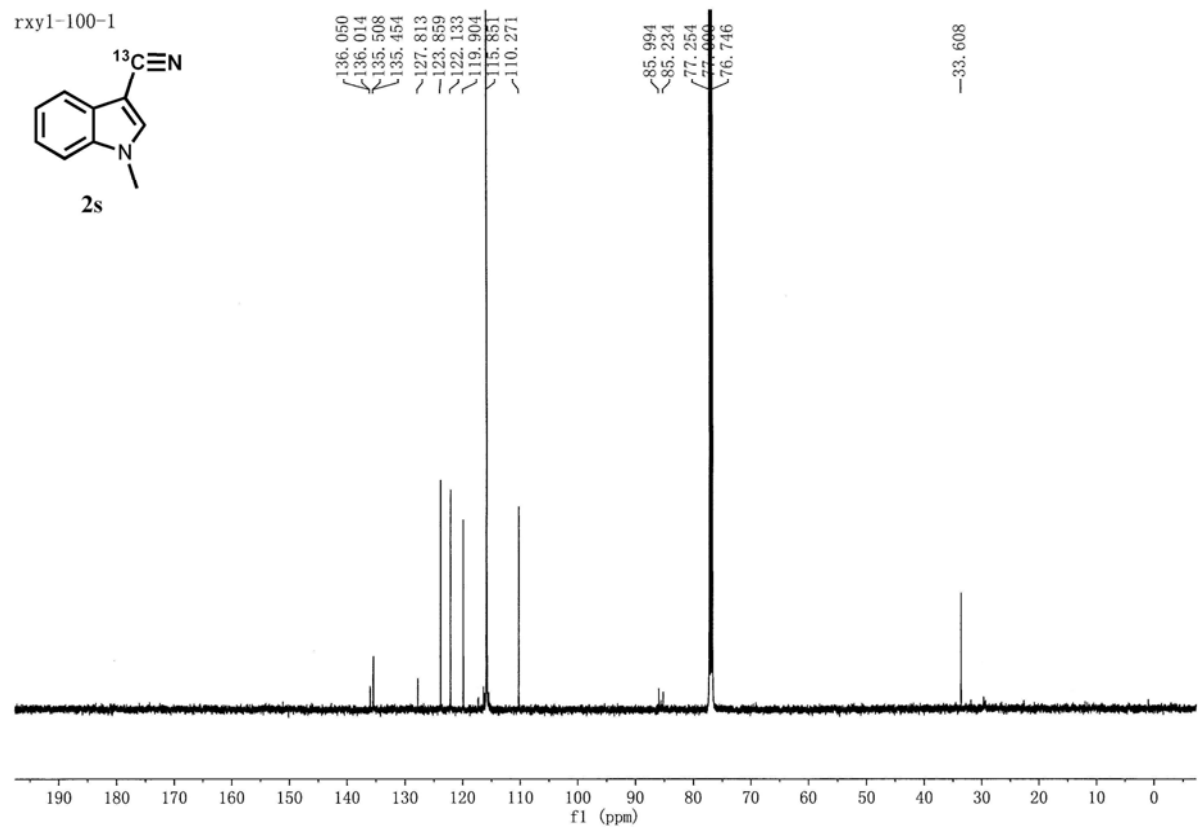

Supplement: c1cc11603g.pdf [file c1cc11603g.pdf]
